# Supplementary material for: Identification of anthropogenic debris in the stomach and intestines of giant freshwater prawns from the Trang River in southern Thailand
Source: PeerJ. 2023 Sep 20;11:e16082. doi: 10.7717/peerj.16082 (PMC10517656; doi:10.7717/peerj.16082)
Supplement: Supplemental Information 1 [file peerj-11-16082-s001.xlsx]

## Sheet: male
No	Weight (g)	Carapace length (cm)	Length of Abdomen (cm)	Stomach (g)	MPs Stomach (particles)	Mps Intestine (particles)	Mps Total (particles)
1	57.26	4.3	8.5	0.34	6	0	6
2	51.82	4.6	8.3	0.87	2	3	5
3	88.23	4.7	9.2	2.04	8	5	13
4	119.72	5.8	10.6	1	0	0	0
5	104	5.6	9.4	4.34	5	15	20
6	122.47	6.2	10.3	3.13	0	3	3
7	110.82	6	10	1.92	0	7	7
8	33.06	3.7	7	0.72	0	5	5
9	160.61	6.3	10	1.09	0	0	0
10	134.4	6	10.3	6.33	7	6	13
11	83.94	5	9.8	0.66	8	0	8
12	85.65	4.7	9.2	3	0	0	0
13	57.26	4.2	8.8	1.66	0	2	2
14	175.25	7	10.7	0.91	0	0	0
15	51.24	4.7	8.2	0.91	1	3	4
16	46.32	4.7	8.1	0.93	3	2	5
17	62	5	9	0.65	4	2	6
18	56.48	5.3	9.1	0.59	5	4	9
19	85.14	5.5	10	0.33	2	0	2
20	52.22	4.8	8.2	0.67	0	4	4
21	156.95	6.1	9.9	2.6	12	1	13
22	173.76	6.6	11.4	1.53	3	0	3
23	35.27	3.6	7.5	0.31	0	3	3
24	46.96	4	8.1	0.52	3	0	3
25	65.78	4.5	8.8	0.57	3	4	7
26	58.08	4.2	8.5	0.3	2	2	4
27	175.61	6.8	11.2	1.11	2	2	4
28	78.18	5	9.1	0.86	2	0	2
29	64.14	4.5	9.1	0.8	8	5	13
30	79.44	5.2	9.6	0.9	5	3	8
sum	2672.06	154.6	277.9	41.59	91	81	172
max	175.61	7	11.4	6.33	12	15	20
min	33.06	3.6	7	0.3	0	0	0
average	89.0687	5.15333	9.26333	1.38633	3.03333	2.7	5.73333
Note: MP=antropogenic debris

## Sheet: female
No	Weight (g)	Carapace length (cm)	Length of Abdomen (cm)	Stomach (g)	MPs Stomach (particles)	Mps Intestine (particles)	Mps Total (particles)
1	81.25	4.8	10	1.28	6	3	9
2	72.15	4.7	9.6	1.07	1	0	1
3	45.35	4.2	8.2	0.57	4	0	4
5	59	4.7	9.1	0.43	5	0	5
6	50.6	4.5	8.3	0.69	3	0	3
7	45.15	4.5	8.1	1.07	9	0	9
8	47.82	4.5	7.6	0.53	14	4	18
9	29.33	3.7	7.4	0.58	6	2	8
10	53	4.8	8.5	0.61	5	2	7
11	43.07	4.3	8	0.45	4	3	7
13	70.96	5.2	9.5	0.68	5	3	8
14	50.3	4.7	8.4	0.87	6	1	7
15	54.29	4.9	8.6	0.31	2	1	3
16	64.06	4.5	9	0.41	4	0	4
17	40.11	4.1	8.2	0.41	6	9	15
18	30.3	3.7	7.4	0.34	3	1	4
19	28.94	3.4	7	0.27	6	2	8
20	99.11	5.4	9.2	0.48	20	0	20
21	55.78	4.2	8.5	0.53	5	5	10
22	56.13	4.5	8.6	0.39	5	3	8
23	54.65	4.1	8.3	0.5	2	4	6
24	59.17	4.4	8.8	0.43	1	1	2
25	62.38	4.7	9	0.73	5	0	5
26	65.81	4.6	9.4	0.61	3	1	4
27	45.27	4	7.9	0.37	2	0	2
28	77.1	4.7	9.3	0.47	0	2	2
29	54.26	4.1	8.4	0.39	6	1	7
30	74.28	4.7	9	0.45	2	1	3
31	37.42	3.8	7.5	0.22	2	0	2
32	37.79	3.9	7.9	0.64	4	3	7
sum	1644.83	132.3	254.7	16.78	146	52	198
max	99.11	5.4	10	1.28	20	9	20
min	28.94	3.4	7	0.22	0	0	1
average	54.8277	4.41	8.49	0.559333	4.86667	1.73333	6.6

## Sheet: total
No	Sex	Weight (g)	Carapace length (cm)	Length of Abdomen (cm)	Stomach (g)	MPs Stomach (particles)	Mps Intestine (particles)	Mps Total (particles)
1	1	57.26	4.3	8.5	0.34	6	0	6		***
2	1	51.82	4.6	8.3	0.87	2	3	5		male	1
3	1	88.23	4.7	9.2	2.04	8	5	13		female	2
4	1	119.72	5.8	10.6	1	0	0	0
5	1	104	5.6	9.4	4.34	5	15	20
6	1	122.47	6.2	10.3	3.13	0	3	3
7	1	110.82	6	10	1.92	0	7	7
8	1	33.06	3.7	7	0.72	0	5	5
9	1	160.61	6.3	10	1.09	0	0	0
10	1	134.4	6	10.3	6.33	7	6	13
11	1	83.94	5	9.8	0.66	8	0	8
12	1	85.65	4.7	9.2	3	0	0	0
13	1	57.26	4.2	8.8	1.66	0	2	2
14	1	175.25	7	10.7	0.91	0	0	0
15	1	51.24	4.7	8.2	0.91	1	3	4
16	1	46.32	4.7	8.1	0.93	3	2	5
17	1	62	5	9	0.65	4	2	6
18	1	56.48	5.3	9.1	0.59	5	4	9
19	1	85.14	5.5	10	0.33	2	0	2
20	1	52.22	4.8	8.2	0.67	0	4	4
21	1	156.95	6.1	9.9	2.6	12	1	13
22	1	173.76	6.6	11.4	1.53	3	0	3
23	1	35.27	3.6	7.5	0.31	0	3	3
24	1	46.96	4	8.1	0.52	3	0	3
25	1	65.78	4.5	8.8	0.57	3	4	7
26	1	58.08	4.2	8.5	0.3	2	2	4
27	1	175.61	6.8	11.2	1.11	2	2	4
28	1	78.18	5	9.1	0.86	2	0	2
29	1	64.14	4.5	9.1	0.8	8	5	13
30	1	79.44	5.2	9.6	0.9	5	3	8
31	2	81.25	4.8	10	1.28	6	3	9
32	2	72.15	4.7	9.6	1.07	1	0	1
33	2	45.35	4.2	8.2	0.57	4	0	4
34	2	59	4.7	9.1	0.43	5	0	5
35	2	50.6	4.5	8.3	0.69	3	0	3
36	2	45.15	4.5	8.1	1.07	9	0	9
37	2	47.82	4.5	7.6	0.53	14	4	18
38	2	29.33	3.7	7.4	0.58	6	2	8
39	2	53	4.8	8.5	0.61	5	2	7
40	2	43.07	4.3	8	0.45	4	3	7
41	2	70.96	5.2	9.5	0.68	5	3	8
42	2	50.3	4.7	8.4	0.87	6	1	7
43	2	54.29	4.9	8.6	0.31	2	1	3
44	2	64.06	4.5	9	0.41	4	0	4
45	2	40.11	4.1	8.2	0.41	6	9	15
46	2	30.3	3.7	7.4	0.34	3	1	4
47	2	28.94	3.4	7	0.27	6	2	8
48	2	99.11	5.4	9.2	0.48	20	0	20
49	2	55.78	4.2	8.5	0.53	5	5	10
50	2	56.13	4.5	8.6	0.39	5	3	8
51	2	54.65	4.1	8.3	0.5	2	4	6
52	2	59.17	4.4	8.8	0.43	1	1	2
53	2	62.38	4.7	9	0.73	5	0	5
54	2	65.81	4.6	9.4	0.61	3	1	4
55	2	45.27	4	7.9	0.37	2	0	2
56	2	77.1	4.7	9.3	0.47	0	2	2
57	2	54.26	4.1	8.4	0.39	6	1	7
58	2	74.28	4.7	9	0.45	2	1	3
59	2	37.42	3.8	7.5	0.22	2	0	2
60	2	37.79	3.9	7.9	0.64	4	3	7

## Sheet: data MPs male 
stomach	No	Characteristics		size				color					intestine	No	Characteristics		size				color
		fiber	fragment	20-100 µm	101-500 µm	501-1000 µm	>1000 µm	black	blue	red	yellow				fiber	fragment	20-100 µm	101-500 µm	501-1000 µm	>1000 µm	black	blue	red	yellow
	1	3	3	2	4	0	0	3	3	0	0			1	0	0	0	0	0	0	0	0	0	0
	2	0	2	2	0	0	0	0	2	0	0			2	2	1	1	1	0	1	1	1	0	1
	3	8	0	3	4	0	1	0	8	0	0			3	3	2	1	4	0	0	0	4	1	0
	4	0	0	0	0	0	0	0	0	0	0			4	0	0	0	0	0	0	0	0	0	0
	5	5	0	0	4	0	1	2	2	1	0			5	14	1	1	7	3	4	5	9	1	0
	6	0	0	0	0	0	0	0	0	0	0			6	3	0	1	1	1	0	2	1	0	0
	7	0	0	0	0	0	0	0	0	0	0			7	7	0	1	3	1	2	2	5	0	0
	8	0	0	0	0	0	0	0	0	0	0			8	4	1	1	1	3	0	4	1	0	0
	9	0	0	0	0	0	0	0	0	0	0			9	0	0	0	0	0	0	0	0	0	0
	10	7	0	5	2	0	0	5	2	0	0			10	6	0	2	2	1	1	4	2	0	0
	11	8	0	0	4	1	3	0	7	1	0			11	0	0	0	0	0	0	0	0	0	0
	12	0	0	0	0	0	0	0	0	0	0			12	0	0	0	0	0	0	0	0	0	0
	13	0	0	0	0	0	0	0	0	0	0			13	2	0	1	0	1	0	1	0	1	0
	14	0	0	0	0	0	0	0	0	0	0			14	0	0	0	0	0	0	0	0	0	0
	15	0	1	1	0	0	0	1	0	0	0			15	3	0	1	0	1	1	1	2	0	0
	16	3	0	3	0	0	0	2	1	0	0			16	2	0	0	2	0	0	1	1	0	0
	17	4	0	1	3	0	0	0	4	0	0			17	1	1	1	0	1	0	1	1	0	0
	18	3	2	3	2	0	0	1	4	0	0			18	4	0	0	3	1	0	3	1	0	0
	19	2	0	0	1	1	0	0	2	0	0			19	0	0	0	0	0	0	0	0	0	0
	20	0	0	0	0	0	0	0	0	0	0			20	4	0	0	0	0	4	2	2	0	0
	21	12	0	4	8	0	0	0	12	0	0			21	1	0	0	0	0	1	0	1	0	0
	22	3	0	0	3	0	0	3	0	0	0			22	0	0	0	0	0	0	0	0	0	0
	23	0	0	0	0	0	0	0	0	0	0			23	3	0	1	1	0	1	2	1	0	0
	24	3	0	2	1	0	0	0	3	0	0			24	0	0	0	0	0	0	0	0	0	0
	25	3	0	2	1	0	0	0	3	0	0			25	4	0	1	3	0	0	3	1	0	0
	26	1	1	2	0	0	0	1	1	0	0			26	2	0	0	1	1	0	2	0	0	0
	27	0	2	2	0	0	0	2	0	0	0			27	2	0	1	1	0	0	0	2	0	0
	28	1	1	2	0	0	0	1	0	1	0			28	0	0	0	0	0	0	0	0	0	0
	29	8	0	1	6	0	1	0	5	3	0			29	4	1	2	2	0	1	1	4	0	0
	30	4	1	1	1	2	1	1	2	2	0			30	3	0	0	2	1	0	1	2	0	0

## Sheet: data MPs female
stomach	No	Characteristics		size				color					intestine	No	Characteristics		size				color
		fiber	fragment	20-100 µm	101-500 µm	501-1000 µm	>1000 µm	black	blue	red	yellow				fiber	fragment	20-100 µm	101-500 µm	501-1000 µm	>1000 µm	black	blue	red	yellow
	1	4	2	3	3	0	0	2	4	0	0			1	3	0	1	0	1	1	0	3	0	0
	2	0	1	1	0	0	0	1	0	0	0			2	0	0	0	0	0	0	0	0	0	0
	3	3	1	1	3	0	0	2	2	0	0			3	0	0	0	0	0	0	0	0	0	0
	4	3	2	2	2	0	1	2	3	0	0			4	0	0	0	0	0	0	0	0	0	0
	5	3	0	1	2	0	0	2	1	0	0			5	0	0	0	0	0	0	0	0	0	0
	6	9	0	1	7	1	0	4	5	0	0			6	0	0	0	0	0	0	0	0	0	0
	7	2	12	11	3	0	0	2	12	0	0			7	3	1	1	1	2	0	0	3	1	0
	8	4	2	3	3	0	0	2	4	0	0			8	2	0	1	1	0	0	2	0	0	0
	9	3	2	3	2	0	0	3	2	0	0			9	2	0	1	0	1	0	1	1	0	0
	10	2	2	2	2	0	0	2	1	1	0			10	3	0	0	3	0	0	2	1	0	0
	11	4	1	2	3	0	0	4	1	0	0			11	3	0	0	0	1	2	0	3	0	0
	12	4	2	2	4	0	0	4	2	0	0			12	1	0	0	0	0	1	0	1	0	0
	13	2	0	1	1	0	0	1	1	0	0			13	1	0	0	0	0	1	0	1	0	0
	14	4	0	1	3	0	0	2	2	0	0			14	0	0	0	0	0	0	0	0	0	0
	15	5	1	2	2	1	1	2	3	1	0			15	3	6	3	5	0	1	0	8	1	0
	16	2	1	2	1	0	0	1	1	1	0			16	0	1	1	0	0	0	0	1	0	0
	17	3	3	3	3	0	0	1	2	3	0			17	0	2	2	0	0	0	0	2	0	0
	18	0	20	13	7	0	0	0	20	0	0			18	0	0	0	0	0	0	0	0	0	0
	19	5	0	2	2	1	0	2	3	0	0			19	1	4	3	2	0	0	0	5	0	0
	20	3	2	1	2	2	0	3	2	0	0			20	3	0	3	0	0	0	1	1	1	0
	21	2	0	0	2	0	0	0	2	0	0			21	3	1	1	3	0	0	2	2	0	0
	22	1	0	0	1	0	0	0	1	0	0			22	1	0	0	0	0	1	0	1	0	0
	23	2	3	2	3	0	0	2	3	0	0			23	0	0	0	0	0	0	0	0	0	0
	24	1	2	2	0	1	0	2	1	0	0			24	0	1	0	1	0	0	0	1	0	0
	25	1	1	1	0	0	1	1	0	1	0			25	0	0	0	0	0	0	0	0	0	0
	26	0	0	0	0	0	0	0	0	0	0			26	2	0	1	1	0	0	0	2	0	0
	27	5	1	2	4	0	0	5	1	0	0			27	1	0	0	0	0	1	0	1	0	0
	28	0	2	2	0	0	0	0	2	0	0			28	1	0	0	0	0	1	0	1	0	0
	29	2	0	2	0	0	0	1	1	0	0			29	0	0	0	0	0	0	0	0	0	0
	30	2	2	3	1	0	0	2	2	0	0			30	3	0	0	2	1	0	0	1	0	0
