# Supplementary material for: Identification of anthropogenic debris in the stomach and intestines of giant freshwater prawns from the Trang River in southern Thailand
Source: PeerJ. 2023 Sep 20;11:e16082. doi: 10.7717/peerj.16082 (PMC10517656; doi:10.7717/peerj.16082)
Supplement: Supplemental Information 2 [file peerj-11-16082-s002.xlsx]

## Sheet: cotton
Created as New Dataset	cotton
cm-1
4000	100.29
3999	100.29
3998	100.28
3997	100.28
3996	100.28
3995	100.26
3994	100.25
3993	100.25
3992	100.27
3991	100.28
3990	100.3
3989	100.3
3988	100.31
3987	100.31
3986	100.31
3985	100.3
3984	100.29
3983	100.29
3982	100.29
3981	100.29
3980	100.28
3979	100.27
3978	100.26
3977	100.25
3976	100.25
3975	100.24
3974	100.24
3973	100.24
3972	100.24
3971	100.25
3970	100.27
3969	100.29
3968	100.3
3967	100.28
3966	100.26
3965	100.24
3964	100.23
3963	100.22
3962	100.22
3961	100.22
3960	100.22
3959	100.24
3958	100.25
3957	100.24
3956	100.22
3955	100.18
3954	100.13
3953	100.06
3952	99.99
3951	99.95
3950	99.95
3949	99.97
3948	99.98
3947	99.97
3946	99.98
3945	100.03
3944	100.09
3943	100.11
3942	100.09
3941	100.11
3940	100.2
3939	100.28
3938	100.26
3937	100.15
3936	100.01
3935	99.92
3934	99.9
3933	99.92
3932	99.96
3931	99.99
3930	99.98
3929	99.94
3928	99.91
3927	99.92
3926	99.93
3925	99.89
3924	99.8
3923	99.76
3922	99.79
3921	99.82
3920	99.86
3919	99.93
3918	100.06
3917	100.17
3916	100.22
3915	100.27
3914	100.35
3913	100.42
3912	100.42
3911	100.32
3910	100.14
3909	99.88
3908	99.61
3907	99.37
3906	99.2
3905	99.07
3904	98.99
3903	99.01
3902	99.22
3901	99.58
3900	99.87
3899	99.94
3898	99.9
3897	99.86
3896	99.85
3895	99.81
3894	99.83
3893	99.93
3892	100
3891	99.8
3890	99.5
3889	99.46
3888	99.7
3887	99.93
3886	99.87
3885	99.52
3884	99.24
3883	99.34
3882	99.67
3881	99.9
3880	99.83
3879	99.61
3878	99.58
3877	99.73
3876	99.79
3875	99.56
3874	99.13
3873	98.87
3872	99.04
3871	99.39
3870	99.44
3869	99.15
3868	99.03
3867	99.29
3866	99.57
3865	99.63
3864	99.59
3863	99.59
3862	99.67
3861	99.73
3860	99.66
3859	99.44
3858	99.09
3857	98.72
3856	98.48
3855	98.64
3854	99.07
3853	99
3852	98.52
3851	98.61
3850	99.21
3849	99.73
3848	99.96
3847	99.97
3846	99.85
3845	99.65
3844	99.37
3843	99.01
3842	98.73
3841	98.67
3840	98.8
3839	98.98
3838	99.05
3837	98.98
3836	98.97
3835	99.16
3834	99.49
3833	99.78
3832	99.88
3831	99.82
3830	99.77
3829	99.83
3828	99.9
3827	99.77
3826	99.4
3825	99.04
3824	98.96
3823	99.13
3822	99.3
3821	99.11
3820	98.69
3819	98.75
3818	99.35
3817	99.91
3816	99.99
3815	99.73
3814	99.65
3813	99.89
3812	100.04
3811	99.96
3810	99.83
3809	99.85
3808	99.9
3807	99.65
3806	99.12
3805	98.84
3804	99.04
3803	99.42
3802	99.55
3801	99.22
3800	98.87
3799	99.05
3798	99.56
3797	99.95
3796	100.05
3795	100.06
3794	100.18
3793	100.35
3792	100.44
3791	100.42
3790	100.33
3789	100.23
3788	100.14
3787	100.1
3786	100.09
3785	100.02
3784	99.88
3783	99.79
3782	99.83
3781	99.96
3780	100.06
3779	100.04
3778	100.02
3777	100.11
3776	100.23
3775	100.21
3774	100.04
3773	99.89
3772	99.87
3771	99.88
3770	99.79
3769	99.65
3768	99.67
3767	99.88
3766	100.05
3765	99.99
3764	99.82
3763	99.74
3762	99.74
3761	99.7
3760	99.61
3759	99.52
3758	99.4
3757	99.25
3756	99.08
3755	98.9
3754	98.65
3753	98.42
3752	98.45
3751	98.64
3750	98.58
3749	98.27
3748	98.23
3747	98.67
3746	99.35
3745	99.79
3744	99.48
3743	98.87
3742	98.81
3741	99.05
3740	99.05
3739	98.77
3738	98.47
3737	98.32
3736	98.36
3735	98.55
3734	98.91
3733	99.31
3732	99.52
3731	99.51
3730	99.52
3729	99.65
3728	99.75
3727	99.72
3726	99.6
3725	99.55
3724	99.63
3723	99.74
3722	99.8
3721	99.85
3720	99.93
3719	100
3718	99.95
3717	99.76
3716	99.53
3715	99.34
3714	99.19
3713	99.12
3712	99.18
3711	99.27
3710	99.37
3709	99.56
3708	99.8
3707	99.97
3706	100.02
3705	100.02
3704	100.03
3703	100.08
3702	100.1
3701	100.05
3700	100.01
3699	100.1
3698	100.21
3697	100.19
3696	100.01
3695	99.75
3694	99.47
3693	99.16
3692	98.91
3691	98.91
3690	99.18
3689	99.43
3688	99.45
3687	99.48
3686	99.75
3685	100.08
3684	100.24
3683	100.19
3682	100.01
3681	99.72
3680	99.25
3679	98.76
3678	98.53
3677	98.71
3676	98.99
3675	98.8
3674	98.47
3673	98.69
3672	99.23
3671	99.64
3670	99.75
3669	99.63
3668	99.66
3667	99.97
3666	100.3
3665	100.46
3664	100.48
3663	100.43
3662	100.3
3661	100.08
3660	99.87
3659	99.79
3658	99.88
3657	99.96
3656	99.78
3655	99.39
3654	99.06
3653	98.78
3652	98.43
3651	98.15
3650	98.24
3649	98.57
3648	98.82
3647	99.01
3646	99.3
3645	99.69
3644	100.02
3643	100.2
3642	100.22
3641	100.18
3640	100.14
3639	100.1
3638	100
3637	99.91
3636	99.86
3635	99.76
3634	99.49
3633	99.12
3632	98.89
3631	98.94
3630	99.29
3629	99.59
3628	99.51
3627	99.44
3626	99.7
3625	99.94
3624	99.91
3623	99.69
3622	99.47
3621	99.38
3620	99.37
3619	99.31
3618	99.17
3617	99.1
3616	99.2
3615	99.35
3614	99.43
3613	99.41
3612	99.39
3611	99.47
3610	99.65
3609	99.81
3608	99.87
3607	99.86
3606	99.87
3605	99.92
3604	99.93
3603	99.89
3602	99.82
3601	99.72
3600	99.62
3599	99.55
3598	99.52
3597	99.55
3596	99.61
3595	99.68
3594	99.69
3593	99.63
3592	99.53
3591	99.44
3590	99.36
3589	99.38
3588	99.5
3587	99.59
3586	99.65
3585	99.78
3584	99.96
3583	100.08
3582	100.12
3581	100.11
3580	100.09
3579	100.07
3578	100.06
3577	100.06
3576	100.06
3575	100.06
3574	100.02
3573	99.89
3572	99.67
3571	99.38
3570	99.1
3569	98.95
3568	98.99
3567	99.14
3566	99.27
3565	99.41
3564	99.59
3563	99.75
3562	99.86
3561	99.93
3560	99.98
3559	100.02
3558	100.02
3557	99.98
3556	99.9
3555	99.83
3554	99.8
3553	99.77
3552	99.71
3551	99.64
3550	99.57
3549	99.52
3548	99.49
3547	99.5
3546	99.55
3545	99.63
3544	99.74
3543	99.84
3542	99.92
3541	99.96
3540	99.95
3539	99.93
3538	99.91
3537	99.9
3536	99.91
3535	99.92
3534	99.92
3533	99.91
3532	99.85
3531	99.78
3530	99.7
3529	99.62
3528	99.56
3527	99.51
3526	99.51
3525	99.58
3524	99.67
3523	99.75
3522	99.81
3521	99.85
3520	99.9
3519	99.94
3518	99.96
3517	99.95
3516	99.94
3515	99.92
3514	99.87
3513	99.81
3512	99.78
3511	99.78
3510	99.79
3509	99.79
3508	99.76
3507	99.72
3506	99.66
3505	99.61
3504	99.58
3503	99.6
3502	99.65
3501	99.72
3500	99.79
3499	99.82
3498	99.83
3497	99.83
3496	99.82
3495	99.83
3494	99.84
3493	99.84
3492	99.83
3491	99.81
3490	99.79
3489	99.77
3488	99.75
3487	99.74
3486	99.73
3485	99.72
3484	99.7
3483	99.69
3482	99.68
3481	99.68
3480	99.7
3479	99.74
3478	99.78
3477	99.8
3476	99.81
3475	99.8
3474	99.78
3473	99.76
3472	99.74
3471	99.71
3470	99.69
3469	99.67
3468	99.67
3467	99.68
3466	99.68
3465	99.68
3464	99.68
3463	99.67
3462	99.66
3461	99.66
3460	99.68
3459	99.72
3458	99.75
3457	99.77
3456	99.77
3455	99.77
3454	99.76
3453	99.75
3452	99.72
3451	99.67
3450	99.63
3449	99.59
3448	99.56
3447	99.55
3446	99.55
3445	99.58
3444	99.64
3443	99.68
3442	99.7
3441	99.69
3440	99.68
3439	99.66
3438	99.65
3437	99.63
3436	99.62
3435	99.62
3434	99.62
3433	99.62
3432	99.61
3431	99.61
3430	99.61
3429	99.63
3428	99.64
3427	99.65
3426	99.65
3425	99.62
3424	99.59
3423	99.57
3422	99.56
3421	99.56
3420	99.59
3419	99.62
3418	99.65
3417	99.67
3416	99.66
3415	99.65
3414	99.63
3413	99.62
3412	99.62
3411	99.62
3410	99.61
3409	99.61
3408	99.61
3407	99.61
3406	99.6
3405	99.58
3404	99.56
3403	99.53
3402	99.51
3401	99.5
3400	99.5
3399	99.52
3398	99.54
3397	99.53
3396	99.52
3395	99.51
3394	99.5
3393	99.49
3392	99.5
3391	99.53
3390	99.56
3389	99.59
3388	99.61
3387	99.61
3386	99.6
3385	99.6
3384	99.59
3383	99.59
3382	99.58
3381	99.58
3380	99.59
3379	99.59
3378	99.59
3377	99.59
3376	99.6
3375	99.6
3374	99.59
3373	99.56
3372	99.53
3371	99.48
3370	99.45
3369	99.43
3368	99.44
3367	99.46
3366	99.49
3365	99.5
3364	99.51
3363	99.51
3362	99.51
3361	99.52
3360	99.53
3359	99.55
3358	99.56
3357	99.58
3356	99.58
3355	99.58
3354	99.56
3353	99.53
3352	99.5
3351	99.49
3350	99.5
3349	99.53
3348	99.56
3347	99.57
3346	99.56
3345	99.55
3344	99.53
3343	99.52
3342	99.51
3341	99.49
3340	99.47
3339	99.47
3338	99.47
3337	99.49
3336	99.52
3335	99.55
3334	99.57
3333	99.59
3332	99.6
3331	99.6
3330	99.58
3329	99.55
3328	99.52
3327	99.5
3326	99.5
3325	99.52
3324	99.55
3323	99.57
3322	99.59
3321	99.61
3320	99.61
3319	99.61
3318	99.6
3317	99.58
3316	99.57
3315	99.56
3314	99.55
3313	99.52
3312	99.49
3311	99.46
3310	99.43
3309	99.41
3308	99.41
3307	99.42
3306	99.45
3305	99.49
3304	99.53
3303	99.56
3302	99.58
3301	99.58
3300	99.57
3299	99.54
3298	99.51
3297	99.49
3296	99.47
3295	99.46
3294	99.47
3293	99.48
3292	99.51
3291	99.55
3290	99.58
3289	99.61
3288	99.63
3287	99.63
3286	99.63
3285	99.63
3284	99.63
3283	99.63
3282	99.62
3281	99.62
3280	99.61
3279	99.6
3278	99.58
3277	99.54
3276	99.52
3275	99.5
3274	99.5
3273	99.5
3272	99.51
3271	99.53
3270	99.57
3269	99.61
3268	99.64
3267	99.65
3266	99.67
3265	99.68
3264	99.69
3263	99.7
3262	99.7
3261	99.69
3260	99.68
3259	99.66
3258	99.64
3257	99.62
3256	99.62
3255	99.64
3254	99.68
3253	99.7
3252	99.72
3251	99.71
3250	99.69
3249	99.66
3248	99.64
3247	99.63
3246	99.65
3245	99.68
3244	99.71
3243	99.73
3242	99.75
3241	99.76
3240	99.76
3239	99.75
3238	99.73
3237	99.71
3236	99.69
3235	99.68
3234	99.68
3233	99.7
3232	99.72
3231	99.75
3230	99.77
3229	99.79
3228	99.8
3227	99.82
3226	99.82
3225	99.82
3224	99.82
3223	99.82
3222	99.81
3221	99.79
3220	99.79
3219	99.79
3218	99.79
3217	99.8
3216	99.81
3215	99.81
3214	99.82
3213	99.83
3212	99.84
3211	99.86
3210	99.87
3209	99.87
3208	99.87
3207	99.88
3206	99.89
3205	99.89
3204	99.9
3203	99.91
3202	99.91
3201	99.92
3200	99.92
3199	99.92
3198	99.91
3197	99.92
3196	99.93
3195	99.95
3194	99.95
3193	99.96
3192	99.95
3191	99.95
3190	99.95
3189	99.97
3188	99.98
3187	99.99
3186	99.99
3185	99.98
3184	99.97
3183	99.97
3182	99.98
3181	99.98
3180	99.99
3179	99.99
3178	100
3177	100.01
3176	100.02
3175	100.03
3174	100.04
3173	100.04
3172	100.04
3171	100.03
3170	100.03
3169	100.04
3168	100.04
3167	100.05
3166	100.06
3165	100.07
3164	100.07
3163	100.08
3162	100.08
3161	100.08
3160	100.09
3159	100.09
3158	100.08
3157	100.06
3156	100.03
3155	100
3154	99.97
3153	99.96
3152	99.97
3151	100
3150	100.04
3149	100.07
3148	100.09
3147	100.1
3146	100.11
3145	100.11
3144	100.1
3143	100.09
3142	100.06
3141	100.04
3140	100.04
3139	100.05
3138	100.07
3137	100.09
3136	100.1
3135	100.11
3134	100.11
3133	100.11
3132	100.1
3131	100.1
3130	100.1
3129	100.11
3128	100.12
3127	100.11
3126	100.1
3125	100.08
3124	100.05
3123	100.03
3122	100.01
3121	99.99
3120	99.99
3119	99.98
3118	99.98
3117	99.98
3116	100.01
3115	100.05
3114	100.09
3113	100.11
3112	100.12
3111	100.11
3110	100.1
3109	100.1
3108	100.12
3107	100.14
3106	100.16
3105	100.17
3104	100.16
3103	100.14
3102	100.12
3101	100.11
3100	100.12
3099	100.14
3098	100.16
3097	100.18
3096	100.2
3095	100.2
3094	100.2
3093	100.19
3092	100.18
3091	100.17
3090	100.16
3089	100.16
3088	100.16
3087	100.15
3086	100.14
3085	100.13
3084	100.12
3083	100.11
3082	100.09
3081	100.08
3080	100.08
3079	100.1
3078	100.13
3077	100.17
3076	100.21
3075	100.24
3074	100.26
3073	100.27
3072	100.26
3071	100.24
3070	100.2
3069	100.17
3068	100.15
3067	100.16
3066	100.18
3065	100.21
3064	100.24
3063	100.27
3062	100.29
3061	100.29
3060	100.29
3059	100.27
3058	100.26
3057	100.25
3056	100.26
3055	100.27
3054	100.27
3053	100.27
3052	100.27
3051	100.26
3050	100.27
3049	100.28
3048	100.28
3047	100.28
3046	100.27
3045	100.26
3044	100.25
3043	100.24
3042	100.25
3041	100.27
3040	100.29
3039	100.31
3038	100.3
3037	100.27
3036	100.24
3035	100.22
3034	100.22
3033	100.24
3032	100.26
3031	100.29
3030	100.31
3029	100.33
3028	100.33
3027	100.33
3026	100.32
3025	100.31
3024	100.31
3023	100.32
3022	100.32
3021	100.31
3020	100.29
3019	100.27
3018	100.26
3017	100.25
3016	100.24
3015	100.23
3014	100.23
3013	100.24
3012	100.26
3011	100.29
3010	100.31
3009	100.34
3008	100.35
3007	100.35
3006	100.34
3005	100.33
3004	100.32
3003	100.32
3002	100.32
3001	100.31
3000	100.3
2999	100.28
2998	100.27
2997	100.26
2996	100.26
2995	100.25
2994	100.24
2993	100.23
2992	100.22
2991	100.22
2990	100.22
2989	100.22
2988	100.22
2987	100.22
2986	100.21
2985	100.2
2984	100.18
2983	100.16
2982	100.14
2981	100.12
2980	100.12
2979	100.11
2978	100.11
2977	100.1
2976	100.08
2975	100.06
2974	100.04
2973	100.02
2972	99.99
2971	99.97
2970	99.94
2969	99.91
2968	99.88
2967	99.85
2966	99.81
2965	99.76
2964	99.72
2963	99.69
2962	99.68
2961	99.68
2960	99.69
2959	99.7
2958	99.71
2957	99.7
2956	99.67
2955	99.64
2954	99.6
2953	99.57
2952	99.55
2951	99.53
2950	99.53
2949	99.53
2948	99.54
2947	99.57
2946	99.61
2945	99.65
2944	99.69
2943	99.74
2942	99.77
2941	99.8
2940	99.82
2939	99.82
2938	99.81
2937	99.8
2936	99.78
2935	99.77
2934	99.74
2933	99.7
2932	99.63
2931	99.56
2930	99.5
2929	99.46
2928	99.44
2927	99.42
2926	99.4
2925	99.36
2924	99.32
2923	99.27
2922	99.21
2921	99.16
2920	99.1
2919	99.05
2918	99.02
2917	99.01
2916	99.01
2915	99.04
2914	99.09
2913	99.15
2912	99.21
2911	99.27
2910	99.33
2909	99.38
2908	99.42
2907	99.45
2906	99.47
2905	99.49
2904	99.5
2903	99.52
2902	99.55
2901	99.58
2900	99.62
2899	99.64
2898	99.65
2897	99.67
2896	99.68
2895	99.71
2894	99.74
2893	99.76
2892	99.79
2891	99.8
2890	99.81
2889	99.81
2888	99.81
2887	99.8
2886	99.8
2885	99.8
2884	99.79
2883	99.79
2882	99.78
2881	99.78
2880	99.78
2879	99.78
2878	99.77
2877	99.76
2876	99.75
2875	99.74
2874	99.74
2873	99.75
2872	99.76
2871	99.77
2870	99.77
2869	99.77
2868	99.77
2867	99.77
2866	99.79
2865	99.82
2864	99.85
2863	99.89
2862	99.92
2861	99.96
2860	99.99
2859	100.03
2858	100.04
2857	100.04
2856	100.01
2855	99.98
2854	99.94
2853	99.89
2852	99.84
2851	99.8
2850	99.78
2849	99.78
2848	99.82
2847	99.87
2846	99.91
2845	99.94
2844	99.95
2843	99.93
2842	99.9
2841	99.87
2840	99.86
2839	99.87
2838	99.9
2837	99.94
2836	99.98
2835	100.03
2834	100.07
2833	100.12
2832	100.17
2831	100.21
2830	100.24
2829	100.27
2828	100.3
2827	100.32
2826	100.34
2825	100.35
2824	100.36
2823	100.37
2822	100.37
2821	100.38
2820	100.39
2819	100.4
2818	100.41
2817	100.43
2816	100.43
2815	100.44
2814	100.44
2813	100.44
2812	100.44
2811	100.44
2810	100.44
2809	100.45
2808	100.46
2807	100.46
2806	100.47
2805	100.48
2804	100.48
2803	100.48
2802	100.47
2801	100.47
2800	100.46
2799	100.45
2798	100.45
2797	100.46
2796	100.48
2795	100.49
2794	100.5
2793	100.5
2792	100.5
2791	100.5
2790	100.5
2789	100.51
2788	100.53
2787	100.54
2786	100.55
2785	100.56
2784	100.56
2783	100.57
2782	100.57
2781	100.58
2780	100.57
2779	100.57
2778	100.56
2777	100.55
2776	100.55
2775	100.55
2774	100.56
2773	100.57
2772	100.59
2771	100.6
2770	100.6
2769	100.6
2768	100.61
2767	100.61
2766	100.61
2765	100.61
2764	100.62
2763	100.62
2762	100.63
2761	100.63
2760	100.63
2759	100.62
2758	100.61
2757	100.61
2756	100.61
2755	100.61
2754	100.61
2753	100.61
2752	100.6
2751	100.59
2750	100.59
2749	100.59
2748	100.6
2747	100.61
2746	100.62
2745	100.63
2744	100.64
2743	100.64
2742	100.64
2741	100.64
2740	100.64
2739	100.64
2738	100.64
2737	100.64
2736	100.64
2735	100.64
2734	100.65
2733	100.65
2732	100.66
2731	100.66
2730	100.65
2729	100.65
2728	100.63
2727	100.62
2726	100.62
2725	100.62
2724	100.62
2723	100.63
2722	100.64
2721	100.65
2720	100.66
2719	100.67
2718	100.67
2717	100.67
2716	100.66
2715	100.66
2714	100.67
2713	100.67
2712	100.67
2711	100.67
2710	100.67
2709	100.68
2708	100.68
2707	100.69
2706	100.7
2705	100.7
2704	100.7
2703	100.7
2702	100.7
2701	100.69
2700	100.7
2699	100.7
2698	100.7
2697	100.7
2696	100.7
2695	100.71
2694	100.71
2693	100.72
2692	100.72
2691	100.72
2690	100.72
2689	100.71
2688	100.71
2687	100.71
2686	100.72
2685	100.72
2684	100.72
2683	100.71
2682	100.71
2681	100.71
2680	100.71
2679	100.72
2678	100.72
2677	100.72
2676	100.73
2675	100.73
2674	100.73
2673	100.73
2672	100.73
2671	100.73
2670	100.72
2669	100.72
2668	100.72
2667	100.71
2666	100.71
2665	100.69
2664	100.67
2663	100.64
2662	100.62
2661	100.6
2660	100.59
2659	100.58
2658	100.57
2657	100.56
2656	100.56
2655	100.55
2654	100.54
2653	100.54
2652	100.54
2651	100.53
2650	100.53
2649	100.53
2648	100.53
2647	100.53
2646	100.54
2645	100.54
2644	100.55
2643	100.55
2642	100.56
2641	100.55
2640	100.55
2639	100.55
2638	100.56
2637	100.57
2636	100.58
2635	100.59
2634	100.59
2633	100.59
2632	100.6
2631	100.61
2630	100.61
2629	100.61
2628	100.61
2627	100.61
2626	100.61
2625	100.61
2624	100.62
2623	100.63
2622	100.64
2621	100.65
2620	100.66
2619	100.67
2618	100.67
2617	100.67
2616	100.67
2615	100.67
2614	100.68
2613	100.69
2612	100.69
2611	100.7
2610	100.7
2609	100.71
2608	100.71
2607	100.71
2606	100.71
2605	100.72
2604	100.73
2603	100.74
2602	100.75
2601	100.75
2600	100.75
2599	100.76
2598	100.76
2597	100.77
2596	100.77
2595	100.76
2594	100.76
2593	100.76
2592	100.76
2591	100.77
2590	100.77
2589	100.77
2588	100.77
2587	100.78
2586	100.78
2585	100.78
2584	100.78
2583	100.79
2582	100.81
2581	100.82
2580	100.82
2579	100.83
2578	100.83
2577	100.83
2576	100.83
2575	100.83
2574	100.84
2573	100.85
2572	100.86
2571	100.86
2570	100.86
2569	100.86
2568	100.87
2567	100.87
2566	100.87
2565	100.87
2564	100.87
2563	100.88
2562	100.89
2561	100.9
2560	100.9
2559	100.9
2558	100.9
2557	100.89
2556	100.89
2555	100.89
2554	100.9
2553	100.9
2552	100.9
2551	100.9
2550	100.9
2549	100.91
2548	100.91
2547	100.92
2546	100.93
2545	100.94
2544	100.94
2543	100.93
2542	100.93
2541	100.93
2540	100.94
2539	100.94
2538	100.94
2537	100.93
2536	100.94
2535	100.95
2534	100.96
2533	100.97
2532	100.96
2531	100.96
2530	100.96
2529	100.97
2528	100.97
2527	100.97
2526	100.96
2525	100.95
2524	100.94
2523	100.93
2522	100.93
2521	100.95
2520	100.96
2519	100.97
2518	100.97
2517	100.96
2516	100.96
2515	100.96
2514	100.96
2513	100.96
2512	100.97
2511	100.97
2510	100.98
2509	100.98
2508	100.98
2507	100.98
2506	100.98
2505	100.98
2504	100.98
2503	100.99
2502	101
2501	101.01
2500	101.01
2499	101.01
2498	101.01
2497	101.02
2496	101.03
2495	101.04
2494	101.06
2493	101.07
2492	101.07
2491	101.04
2490	101.02
2489	101.01
2488	101.01
2487	101.03
2486	101.04
2485	101.06
2484	101.06
2483	101.06
2482	101.06
2481	101.05
2480	101.05
2479	101.04
2478	101.04
2477	101.04
2476	101.02
2475	101.02
2474	101.03
2473	101.05
2472	101.07
2471	101.07
2470	101.05
2469	101.03
2468	101.02
2467	101.02
2466	101.02
2465	101.03
2464	101.04
2463	101.03
2462	101.03
2461	101.03
2460	101.02
2459	101.01
2458	101
2457	100.99
2456	100.98
2455	100.97
2454	100.97
2453	100.98
2452	100.99
2451	100.99
2450	101
2449	101
2448	101
2447	101.01
2446	101.02
2445	101.03
2444	101.04
2443	101.04
2442	101.04
2441	101.04
2440	101.03
2439	101.03
2438	101.04
2437	101.05
2436	101.06
2435	101.06
2434	101.05
2433	101.06
2432	101.07
2431	101.09
2430	101.11
2429	101.12
2428	101.13
2427	101.13
2426	101.14
2425	101.14
2424	101.14
2423	101.14
2422	101.14
2421	101.14
2420	101.14
2419	101.13
2418	101.14
2417	101.14
2416	101.15
2415	101.15
2414	101.16
2413	101.16
2412	101.17
2411	101.17
2410	101.16
2409	101.17
2408	101.18
2407	101.2
2406	101.22
2405	101.23
2404	101.24
2403	101.23
2402	101.22
2401	101.21
2400	101.2
2399	101.2
2398	101.21
2397	101.21
2396	101.22
2395	101.22
2394	101.22
2393	101.22
2392	101.21
2391	101.21
2390	101.2
2389	101.18
2388	101.15
2387	101.11
2386	101.06
2385	101.02
2384	100.99
2383	100.98
2382	100.98
2381	101
2380	101.03
2379	101.06
2378	101.09
2377	101.12
2376	101.14
2375	101.16
2374	101.16
2373	101.16
2372	101.15
2371	101.14
2370	101.11
2369	101.07
2368	101.02
2367	100.98
2366	100.93
2365	100.88
2364	100.86
2363	100.89
2362	100.94
2361	101.02
2360	101.12
2359	101.25
2358	101.44
2357	101.64
2356	101.84
2355	102
2354	102.08
2353	101.91
2352	101.49
2351	101
2350	100.65
2349	100.57
2348	100.66
2347	100.71
2346	100.64
2345	100.55
2344	100.6
2343	100.73
2342	100.89
2341	101.02
2340	101.11
2339	101.16
2338	101.19
2337	101.2
2336	101.23
2335	101.28
2334	101.38
2333	101.46
2332	101.49
2331	101.47
2330	101.41
2329	101.33
2328	101.21
2327	101.1
2326	101.01
2325	100.96
2324	100.97
2323	101.01
2322	101.08
2321	101.12
2320	101.12
2319	101.1
2318	101.08
2317	101.08
2316	101.09
2315	101.08
2314	101.06
2313	101.02
2312	100.97
2311	100.93
2310	100.91
2309	100.9
2308	100.9
2307	100.88
2306	100.85
2305	100.8
2304	100.76
2303	100.73
2302	100.71
2301	100.71
2300	100.71
2299	100.7
2298	100.69
2297	100.68
2296	100.66
2295	100.64
2294	100.63
2293	100.63
2292	100.62
2291	100.62
2290	100.61
2289	100.6
2288	100.58
2287	100.57
2286	100.56
2285	100.58
2284	100.6
2283	100.63
2282	100.65
2281	100.66
2280	100.68
2279	100.69
2278	100.7
2277	100.71
2276	100.71
2275	100.71
2274	100.72
2273	100.74
2272	100.76
2271	100.76
2270	100.75
2269	100.75
2268	100.78
2267	100.82
2266	100.87
2265	100.91
2264	100.92
2263	100.9
2262	100.88
2261	100.85
2260	100.82
2259	100.81
2258	100.82
2257	100.85
2256	100.89
2255	100.92
2254	100.95
2253	100.96
2252	100.95
2251	100.93
2250	100.9
2249	100.88
2248	100.88
2247	100.89
2246	100.91
2245	100.93
2244	100.94
2243	100.94
2242	100.93
2241	100.92
2240	100.91
2239	100.9
2238	100.89
2237	100.88
2236	100.87
2235	100.87
2234	100.91
2233	100.97
2232	101.01
2231	101.01
2230	100.98
2229	100.95
2228	100.93
2227	100.93
2226	100.94
2225	100.95
2224	100.94
2223	100.92
2222	100.92
2221	100.93
2220	100.94
2219	100.94
2218	100.95
2217	100.97
2216	100.99
2215	100.98
2214	100.97
2213	100.97
2212	100.97
2211	100.97
2210	100.96
2209	100.96
2208	100.96
2207	100.96
2206	100.96
2205	100.95
2204	100.92
2203	100.89
2202	100.87
2201	100.86
2200	100.85
2199	100.86
2198	100.88
2197	100.91
2196	100.93
2195	100.92
2194	100.9
2193	100.86
2192	100.83
2191	100.8
2190	100.78
2189	100.77
2188	100.74
2187	100.71
2186	100.7
2185	100.73
2184	100.78
2183	100.86
2182	100.95
2181	101.01
2180	101.01
2179	100.95
2178	100.88
2177	100.88
2176	100.93
2175	100.99
2174	101.02
2173	100.99
2172	100.9
2171	100.77
2170	100.63
2169	100.52
2168	100.42
2167	100.35
2166	100.32
2165	100.31
2164	100.27
2163	100.22
2162	100.26
2161	100.5
2160	100.93
2159	101.45
2158	101.89
2157	102.13
2156	102.17
2155	102.1
2154	101.98
2153	101.86
2152	101.76
2151	101.7
2150	101.69
2149	101.7
2148	101.71
2147	101.69
2146	101.68
2145	101.68
2144	101.67
2143	101.67
2142	101.66
2141	101.65
2140	101.63
2139	101.61
2138	101.62
2137	101.66
2136	101.74
2135	101.83
2134	101.91
2133	101.93
2132	101.87
2131	101.79
2130	101.72
2129	101.68
2128	101.63
2127	101.57
2126	101.51
2125	101.47
2124	101.41
2123	101.34
2122	101.29
2121	101.26
2120	101.26
2119	101.25
2118	101.23
2117	101.18
2116	101.12
2115	101.06
2114	101.01
2113	100.98
2112	100.97
2111	100.96
2110	100.98
2109	101.01
2108	101.05
2107	101.07
2106	101.08
2105	101.07
2104	101.04
2103	101.03
2102	101.03
2101	101.05
2100	101.07
2099	101.08
2098	101.1
2097	101.14
2096	101.2
2095	101.26
2094	101.3
2093	101.3
2092	101.26
2091	101.18
2090	101.1
2089	101.04
2088	100.99
2087	100.97
2086	100.97
2085	100.96
2084	100.93
2083	100.89
2082	100.86
2081	100.84
2080	100.82
2079	100.8
2078	100.8
2077	100.81
2076	100.83
2075	100.85
2074	100.88
2073	100.89
2072	100.88
2071	100.86
2070	100.85
2069	100.84
2068	100.82
2067	100.79
2066	100.77
2065	100.78
2064	100.82
2063	100.86
2062	100.89
2061	100.9
2060	100.87
2059	100.81
2058	100.75
2057	100.7
2056	100.65
2055	100.63
2054	100.59
2053	100.48
2052	100.32
2051	100.19
2050	100.18
2049	100.3
2048	100.45
2047	100.55
2046	100.61
2045	100.64
2044	100.61
2043	100.54
2042	100.48
2041	100.44
2040	100.4
2039	100.35
2038	100.33
2037	100.34
2036	100.36
2035	100.39
2034	100.46
2033	100.56
2032	100.65
2031	100.7
2030	100.76
2029	100.82
2028	100.85
2027	100.83
2026	100.82
2025	100.83
2024	100.81
2023	100.76
2022	100.73
2021	100.73
2020	100.74
2019	100.74
2018	100.76
2017	100.81
2016	100.82
2015	100.77
2014	100.7
2013	100.64
2012	100.62
2011	100.63
2010	100.74
2009	100.91
2008	101.1
2007	101.24
2006	101.34
2005	101.37
2004	101.33
2003	101.24
[truncated: 1,603 more rows]

## Sheet: rayon
Created as New Dataset	rayon
cm-1
4000	101.14
3999	101.14
3998	101.15
3997	101.15
3996	101.16
3995	101.15
3994	101.15
3993	101.16
3992	101.18
3991	101.19
3990	101.19
3989	101.18
3988	101.18
3987	101.17
3986	101.16
3985	101.15
3984	101.15
3983	101.16
3982	101.17
3981	101.18
3980	101.18
3979	101.17
3978	101.17
3977	101.17
3976	101.18
3975	101.19
3974	101.21
3973	101.22
3972	101.22
3971	101.23
3970	101.24
3969	101.23
3968	101.21
3967	101.19
3966	101.17
3965	101.16
3964	101.17
3963	101.2
3962	101.22
3961	101.24
3960	101.26
3959	101.26
3958	101.26
3957	101.24
3956	101.22
3955	101.21
3954	101.2
3953	101.21
3952	101.24
3951	101.28
3950	101.34
3949	101.4
3948	101.42
3947	101.42
3946	101.43
3945	101.47
3944	101.51
3943	101.51
3942	101.47
3941	101.44
3940	101.42
3939	101.39
3938	101.32
3937	101.24
3936	101.21
3935	101.25
3934	101.32
3933	101.4
3932	101.47
3931	101.54
3930	101.56
3929	101.55
3928	101.52
3927	101.51
3926	101.51
3925	101.49
3924	101.48
3923	101.52
3922	101.58
3921	101.62
3920	101.61
3919	101.61
3918	101.65
3917	101.66
3916	101.62
3915	101.56
3914	101.51
3913	101.45
3912	101.36
3911	101.26
3910	101.2
3909	101.2
3908	101.29
3907	101.44
3906	101.61
3905	101.74
3904	101.86
3903	102.02
3902	102.25
3901	102.46
3900	102.48
3899	102.29
3898	102.02
3897	101.81
3896	101.69
3895	101.66
3894	101.69
3893	101.76
3892	101.77
3891	101.65
3890	101.52
3889	101.59
3888	101.79
3887	101.88
3886	101.72
3885	101.51
3884	101.56
3883	101.9
3882	102.26
3881	102.34
3880	102.12
3879	101.83
3878	101.72
3877	101.79
3876	101.85
3875	101.76
3874	101.62
3873	101.66
3872	101.93
3871	102.16
3870	102.08
3869	101.85
3868	101.82
3867	102.03
3866	102.18
3865	102.11
3864	102
3863	102
3862	102.01
3861	101.93
3860	101.81
3859	101.75
3858	101.8
3857	101.94
3856	102.04
3855	101.89
3854	101.6
3853	101.46
3852	101.55
3851	101.82
3850	102.06
3849	102.08
3848	101.94
3847	101.77
3846	101.66
3845	101.61
3844	101.6
3843	101.62
3842	101.71
3841	101.89
3840	102.08
3839	102.16
3838	102.14
3837	102.09
3836	102.11
3835	102.2
3834	102.28
3833	102.25
3832	102.08
3831	101.84
3830	101.7
3829	101.7
3828	101.74
3827	101.71
3826	101.6
3825	101.6
3824	101.8
3823	102.04
3822	102.09
3821	101.94
3820	101.84
3819	102
3818	102.28
3817	102.31
3816	101.96
3815	101.58
3814	101.49
3813	101.61
3812	101.66
3811	101.56
3810	101.47
3809	101.48
3808	101.46
3807	101.31
3806	101.19
3805	101.34
3804	101.72
3803	102.01
3802	101.94
3801	101.68
3800	101.62
3799	101.88
3798	102.18
3797	102.22
3796	102.01
3795	101.76
3794	101.63
3793	101.57
3792	101.48
3791	101.36
3790	101.26
3789	101.21
3788	101.2
3787	101.24
3786	101.32
3785	101.38
3784	101.4
3783	101.44
3782	101.54
3781	101.62
3780	101.64
3779	101.6
3778	101.55
3777	101.55
3776	101.53
3775	101.43
3774	101.32
3773	101.32
3772	101.41
3771	101.49
3770	101.49
3769	101.5
3768	101.63
3767	101.8
3766	101.85
3765	101.72
3764	101.57
3763	101.56
3762	101.64
3761	101.66
3760	101.64
3759	101.7
3758	101.79
3757	101.85
3756	101.85
3755	101.84
3754	101.76
3753	101.58
3752	101.51
3751	101.7
3750	101.93
3749	102.07
3748	102.28
3747	102.7
3746	103.01
3745	102.73
3744	102.04
3743	101.63
3742	101.74
3741	102.01
3740	102.09
3739	102.01
3738	101.96
3737	102.02
3736	102.24
3735	102.58
3734	102.88
3733	102.9
3732	102.56
3731	102.12
3730	101.84
3729	101.8
3728	101.83
3727	101.78
3726	101.71
3725	101.78
3724	101.93
3723	102.03
3722	102.01
3721	101.92
3720	101.86
3719	101.81
3718	101.73
3717	101.61
3716	101.55
3715	101.55
3714	101.55
3713	101.54
3712	101.64
3711	101.9
3710	102.12
3709	102.17
3708	102.05
3707	101.85
3706	101.67
3705	101.59
3704	101.59
3703	101.61
3702	101.6
3701	101.54
3700	101.48
3699	101.46
3698	101.44
3697	101.36
3696	101.26
3695	101.23
3694	101.29
3693	101.37
3692	101.43
3691	101.54
3690	101.74
3689	101.85
3688	101.77
3687	101.66
3686	101.66
3685	101.69
3684	101.62
3683	101.47
3682	101.37
3681	101.33
3680	101.33
3679	101.39
3678	101.6
3677	101.9
3676	102.08
3675	102.06
3674	102.03
3673	102.19
3672	102.39
3671	102.39
3670	102.2
3669	102.02
3668	101.94
3667	101.89
3666	101.77
3665	101.57
3664	101.37
3663	101.22
3662	101.13
3661	101.07
3660	101.08
3659	101.19
3658	101.32
3657	101.35
3656	101.28
3655	101.25
3654	101.41
3653	101.67
3652	101.77
3651	101.71
3650	101.86
3649	102.34
3648	102.75
3647	102.77
3646	102.51
3645	102.19
3644	101.92
3643	101.68
3642	101.46
3641	101.29
3640	101.21
3639	101.16
3638	101.12
3637	101.11
3636	101.15
3635	101.19
3634	101.19
3633	101.25
3632	101.44
3631	101.7
3630	101.83
3629	101.8
3628	101.71
3627	101.66
3626	101.69
3625	101.66
3624	101.53
3623	101.41
3622	101.41
3621	101.5
3620	101.58
3619	101.63
3618	101.65
3617	101.7
3616	101.81
3615	101.9
3614	101.92
3613	101.85
3612	101.77
3611	101.73
3610	101.69
3609	101.64
3608	101.58
3607	101.52
3606	101.46
3605	101.36
3604	101.24
3603	101.13
3602	101.06
3601	101.05
3600	101.09
3599	101.15
3598	101.23
3597	101.29
3596	101.34
3595	101.35
3594	101.33
3593	101.29
3592	101.26
3591	101.27
3590	101.32
3589	101.38
3588	101.49
3587	101.6
3586	101.63
3585	101.57
3584	101.44
3583	101.29
3582	101.15
3581	101.04
3580	100.97
3579	100.95
3578	100.94
3577	100.93
3576	100.93
3575	100.91
3574	100.89
3573	100.86
3572	100.84
3571	100.87
3570	100.94
3569	101.07
3568	101.26
3567	101.51
3566	101.68
3565	101.7
3564	101.58
3563	101.4
3562	101.21
3561	101.05
3560	100.95
3559	100.88
3558	100.81
3557	100.75
3556	100.7
3555	100.68
3554	100.69
3553	100.72
3552	100.75
3551	100.75
3550	100.74
3549	100.74
3548	100.75
3547	100.78
3546	100.84
3545	100.9
3544	100.93
3543	100.9
3542	100.82
3541	100.72
3540	100.63
3539	100.57
3538	100.55
3537	100.56
3536	100.57
3535	100.58
3534	100.57
3533	100.55
3532	100.53
3531	100.53
3530	100.55
3529	100.59
3528	100.63
3527	100.65
3526	100.68
3525	100.7
3524	100.72
3523	100.72
3522	100.7
3521	100.65
3520	100.6
3519	100.55
3518	100.5
3517	100.45
3516	100.42
3515	100.39
3514	100.37
3513	100.36
3512	100.38
3511	100.42
3510	100.47
3509	100.49
3508	100.48
3507	100.45
3506	100.42
3505	100.4
3504	100.4
3503	100.44
3502	100.49
3501	100.5
3500	100.48
3499	100.42
3498	100.37
3497	100.33
3496	100.31
3495	100.31
3494	100.3
3493	100.29
3492	100.27
3491	100.25
3490	100.24
3489	100.24
3488	100.25
3487	100.26
3486	100.27
3485	100.27
3484	100.26
3483	100.26
3482	100.25
3481	100.25
3480	100.25
3479	100.23
3478	100.21
3477	100.19
3476	100.17
3475	100.16
3474	100.15
3473	100.13
3472	100.1
3471	100.07
3470	100.04
3469	100.03
3468	100.03
3467	100.05
3466	100.07
3465	100.08
3464	100.09
3463	100.09
3462	100.08
3461	100.07
3460	100.07
3459	100.07
3458	100.07
3457	100.06
3456	100.04
3455	100.03
3454	100.02
3453	100.01
3452	100
3451	99.99
3450	99.99
3449	100.01
3448	100.04
3447	100.07
3446	100.09
3445	100.11
3444	100.11
3443	100.09
3442	100.06
3441	100.03
3440	100
3439	99.96
3438	99.93
3437	99.9
3436	99.88
3435	99.88
3434	99.88
3433	99.88
3432	99.88
3431	99.87
3430	99.87
3429	99.87
3428	99.88
3427	99.88
3426	99.87
3425	99.87
3424	99.86
3423	99.87
3422	99.88
3421	99.91
3420	99.93
3419	99.94
3418	99.92
3417	99.89
3416	99.86
3415	99.82
3414	99.79
3413	99.78
3412	99.77
3411	99.76
3410	99.76
3409	99.75
3408	99.76
3407	99.75
3406	99.75
3405	99.73
3404	99.71
3403	99.69
3402	99.68
3401	99.68
3400	99.69
3399	99.71
3398	99.72
3397	99.72
3396	99.72
3395	99.71
3394	99.7
3393	99.7
3392	99.7
3391	99.71
3390	99.73
3389	99.74
3388	99.73
3387	99.73
3386	99.73
3385	99.73
3384	99.73
3383	99.72
3382	99.7
3381	99.68
3380	99.67
3379	99.66
3378	99.65
3377	99.65
3376	99.65
3375	99.65
3374	99.64
3373	99.62
3372	99.59
3371	99.56
3370	99.54
3369	99.54
3368	99.55
3367	99.57
3366	99.6
3365	99.61
3364	99.62
3363	99.62
3362	99.61
3361	99.61
3360	99.61
3359	99.61
3358	99.62
3357	99.63
3356	99.63
3355	99.61
3354	99.58
3353	99.54
3352	99.51
3351	99.5
3350	99.5
3349	99.52
3348	99.54
3347	99.55
3346	99.54
3345	99.52
3344	99.5
3343	99.49
3342	99.47
3341	99.46
3340	99.45
3339	99.45
3338	99.47
3337	99.5
3336	99.53
3335	99.55
3334	99.56
3333	99.56
3332	99.55
3331	99.54
3330	99.52
3329	99.5
3328	99.48
3327	99.47
3326	99.47
3325	99.48
3324	99.49
3323	99.51
3322	99.52
3321	99.53
3320	99.54
3319	99.54
3318	99.54
3317	99.53
3316	99.52
3315	99.52
3314	99.51
3313	99.5
3312	99.48
3311	99.45
3310	99.43
3309	99.41
3308	99.41
3307	99.41
3306	99.42
3305	99.44
3304	99.46
3303	99.48
3302	99.49
3301	99.49
3300	99.48
3299	99.46
3298	99.43
3297	99.41
3296	99.4
3295	99.4
3294	99.41
3293	99.43
3292	99.45
3291	99.48
3290	99.49
3289	99.5
3288	99.51
3287	99.51
3286	99.51
3285	99.51
3284	99.51
3283	99.51
3282	99.5
3281	99.5
3280	99.5
3279	99.5
3278	99.49
3277	99.47
3276	99.46
3275	99.45
3274	99.45
3273	99.44
3272	99.44
3271	99.44
3270	99.46
3269	99.48
3268	99.5
3267	99.52
3266	99.53
3265	99.53
3264	99.54
3263	99.55
3262	99.55
3261	99.56
3260	99.56
3259	99.55
3258	99.54
3257	99.53
3256	99.53
3255	99.55
3254	99.58
3253	99.6
3252	99.6
3251	99.59
3250	99.57
3249	99.55
3248	99.55
3247	99.55
3246	99.58
3245	99.61
3244	99.64
3243	99.66
3242	99.67
3241	99.67
3240	99.67
3239	99.66
3238	99.64
3237	99.62
3236	99.61
3235	99.59
3234	99.6
3233	99.61
3232	99.64
3231	99.67
3230	99.7
3229	99.72
3228	99.74
3227	99.75
3226	99.75
3225	99.75
3224	99.75
3223	99.75
3222	99.74
3221	99.74
3220	99.75
3219	99.77
3218	99.79
3217	99.8
3216	99.81
3215	99.81
3214	99.81
3213	99.82
3212	99.83
3211	99.84
3210	99.84
3209	99.85
3208	99.85
3207	99.86
3206	99.86
3205	99.86
3204	99.86
3203	99.86
3202	99.87
3201	99.88
3200	99.89
3199	99.89
3198	99.9
3197	99.91
3196	99.92
3195	99.92
3194	99.92
3193	99.92
3192	99.93
3191	99.93
3190	99.93
3189	99.94
3188	99.95
3187	99.97
3186	99.98
3185	99.99
3184	99.99
3183	99.99
3182	99.99
3181	99.99
3180	100
3179	100.01
3178	100.02
3177	100.04
3176	100.05
3175	100.05
3174	100.05
3173	100.05
3172	100.05
3171	100.05
3170	100.05
3169	100.06
3168	100.07
3167	100.07
3166	100.08
3165	100.08
3164	100.08
3163	100.09
3162	100.09
3161	100.1
3160	100.1
3159	100.09
3158	100.08
3157	100.06
3156	100.04
3155	100.02
3154	100.01
3153	100.02
3152	100.03
3151	100.06
3150	100.09
3149	100.11
3148	100.12
3147	100.13
3146	100.13
3145	100.14
3144	100.14
3143	100.13
3142	100.11
3141	100.1
3140	100.09
3139	100.1
3138	100.12
3137	100.14
3136	100.16
3135	100.17
3134	100.17
3133	100.18
3132	100.19
3131	100.19
3130	100.18
3129	100.18
3128	100.19
3127	100.2
3126	100.21
3125	100.2
3124	100.19
3123	100.18
3122	100.16
3121	100.15
3120	100.14
3119	100.13
3118	100.14
3117	100.15
3116	100.18
3115	100.22
3114	100.24
3113	100.26
3112	100.25
3111	100.24
3110	100.23
3109	100.22
3108	100.23
3107	100.25
3106	100.26
3105	100.27
3104	100.27
3103	100.27
3102	100.27
3101	100.27
3100	100.27
3099	100.29
3098	100.3
3097	100.31
3096	100.32
3095	100.33
3094	100.32
3093	100.31
3092	100.29
3091	100.27
3090	100.27
3089	100.27
3088	100.26
3087	100.26
3086	100.26
3085	100.26
3084	100.26
3083	100.26
3082	100.27
3081	100.27
3080	100.28
3079	100.29
3078	100.3
3077	100.32
3076	100.34
3075	100.35
3074	100.36
3073	100.36
3072	100.35
3071	100.34
3070	100.32
3069	100.31
3068	100.31
3067	100.33
3066	100.36
3065	100.39
3064	100.42
3063	100.43
3062	100.44
3061	100.43
3060	100.42
3059	100.4
3058	100.4
3057	100.4
3056	100.41
3055	100.42
3054	100.42
3053	100.41
3052	100.4
3051	100.4
3050	100.41
3049	100.42
3048	100.43
3047	100.43
3046	100.42
3045	100.4
3044	100.38
3043	100.38
3042	100.38
3041	100.4
3040	100.43
3039	100.44
3038	100.44
3037	100.42
3036	100.41
3035	100.4
3034	100.41
3033	100.43
3032	100.46
3031	100.48
3030	100.49
3029	100.49
3028	100.48
3027	100.47
3026	100.45
3025	100.44
3024	100.44
3023	100.44
3022	100.44
3021	100.43
3020	100.41
3019	100.4
3018	100.39
3017	100.39
3016	100.38
3015	100.39
3014	100.39
3013	100.4
3012	100.41
3011	100.43
3010	100.44
3009	100.45
3008	100.45
3007	100.44
3006	100.43
3005	100.42
3004	100.41
3003	100.4
3002	100.39
3001	100.37
3000	100.35
2999	100.33
2998	100.32
2997	100.31
2996	100.31
2995	100.31
2994	100.3
2993	100.28
2992	100.27
2991	100.26
2990	100.26
2989	100.26
2988	100.26
2987	100.26
2986	100.25
2985	100.25
2984	100.23
2983	100.22
2982	100.21
2981	100.21
2980	100.21
2979	100.21
2978	100.21
2977	100.2
2976	100.2
2975	100.19
2974	100.19
2973	100.19
2972	100.18
2971	100.18
2970	100.18
2969	100.17
2968	100.17
2967	100.17
2966	100.18
2965	100.18
2964	100.18
2963	100.18
2962	100.18
2961	100.19
2960	100.2
2959	100.21
2958	100.21
2957	100.21
2956	100.21
2955	100.2
2954	100.2
2953	100.19
2952	100.2
2951	100.2
2950	100.19
2949	100.18
2948	100.17
2947	100.16
2946	100.16
2945	100.16
2944	100.16
2943	100.16
2942	100.16
2941	100.16
2940	100.15
2939	100.14
2938	100.13
2937	100.12
2936	100.12
2935	100.11
2934	100.1
2933	100.09
2932	100.07
2931	100.04
2930	100.03
2929	100.02
2928	100.03
2927	100.04
2926	100.05
2925	100.06
2924	100.06
2923	100.07
2922	100.07
2921	100.06
2920	100.06
2919	100.05
2918	100.03
2917	100.02
2916	100.01
2915	100
2914	100
2913	100.01
2912	100.02
2911	100.03
2910	100.05
2909	100.07
2908	100.07
2907	100.07
2906	100.06
2905	100.04
2904	100.03
2903	100.03
2902	100.03
2901	100.04
2900	100.05
2899	100.05
2898	100.05
2897	100.05
2896	100.06
2895	100.07
2894	100.08
2893	100.1
2892	100.11
2891	100.12
2890	100.13
2889	100.14
2888	100.14
2887	100.15
2886	100.15
2885	100.15
2884	100.15
2883	100.15
2882	100.16
2881	100.17
2880	100.18
2879	100.18
2878	100.18
2877	100.18
2876	100.17
2875	100.16
2874	100.15
2873	100.16
2872	100.17
2871	100.18
2870	100.19
2869	100.2
2868	100.21
2867	100.21
2866	100.22
2865	100.24
2864	100.25
2863	100.26
2862	100.27
2861	100.29
2860	100.3
2859	100.32
2858	100.33
2857	100.34
2856	100.34
2855	100.34
2854	100.34
2853	100.34
2852	100.34
2851	100.34
2850	100.35
2849	100.36
2848	100.38
2847	100.41
2846	100.44
2845	100.46
2844	100.47
2843	100.48
2842	100.48
2841	100.48
2840	100.48
2839	100.49
2838	100.5
2837	100.52
2836	100.53
2835	100.54
2834	100.55
2833	100.55
2832	100.56
2831	100.57
2830	100.58
2829	100.59
2828	100.59
2827	100.6
2826	100.6
2825	100.61
2824	100.61
2823	100.61
2822	100.62
2821	100.63
2820	100.63
2819	100.64
2818	100.64
2817	100.64
2816	100.63
2815	100.63
2814	100.64
2813	100.64
2812	100.64
2811	100.64
2810	100.65
2809	100.65
2808	100.66
2807	100.66
2806	100.67
2805	100.67
2804	100.67
2803	100.67
2802	100.66
2801	100.66
2800	100.65
2799	100.65
2798	100.65
2797	100.67
2796	100.68
2795	100.69
2794	100.7
2793	100.7
2792	100.7
2791	100.69
2790	100.69
2789	100.7
2788	100.71
2787	100.72
2786	100.73
2785	100.74
2784	100.74
2783	100.74
2782	100.74
2781	100.74
2780	100.74
2779	100.74
2778	100.74
2777	100.74
2776	100.73
2775	100.73
2774	100.73
2773	100.74
2772	100.75
2771	100.76
2770	100.77
2769	100.77
2768	100.77
2767	100.78
2766	100.78
2765	100.78
2764	100.79
2763	100.79
2762	100.8
2761	100.79
2760	100.78
2759	100.78
2758	100.78
2757	100.78
2756	100.78
2755	100.78
2754	100.78
2753	100.78
2752	100.78
2751	100.78
2750	100.77
2749	100.77
2748	100.78
2747	100.79
2746	100.8
2745	100.81
2744	100.81
2743	100.81
2742	100.81
2741	100.81
2740	100.82
2739	100.82
2738	100.82
2737	100.82
2736	100.82
2735	100.83
2734	100.83
2733	100.83
2732	100.84
2731	100.84
2730	100.84
2729	100.83
2728	100.82
2727	100.82
2726	100.82
2725	100.82
2724	100.82
2723	100.83
2722	100.84
2721	100.84
2720	100.84
2719	100.85
2718	100.85
2717	100.85
2716	100.85
2715	100.85
2714	100.86
2713	100.86
2712	100.87
2711	100.87
2710	100.87
2709	100.87
2708	100.87
2707	100.87
2706	100.87
2705	100.88
2704	100.88
2703	100.88
2702	100.88
2701	100.88
2700	100.88
2699	100.88
2698	100.88
2697	100.88
2696	100.88
2695	100.89
2694	100.9
2693	100.91
2692	100.91
2691	100.9
2690	100.9
2689	100.89
2688	100.89
2687	100.9
2686	100.9
2685	100.9
2684	100.9
2683	100.9
2682	100.9
2681	100.9
2680	100.9
2679	100.9
2678	100.9
2677	100.91
2676	100.92
2675	100.92
2674	100.93
2673	100.92
2672	100.92
2671	100.91
2670	100.91
2669	100.91
2668	100.91
2667	100.9
2666	100.89
2665	100.87
2664	100.85
2663	100.84
2662	100.82
2661	100.81
2660	100.8
2659	100.78
2658	100.77
2657	100.76
2656	100.75
2655	100.75
2654	100.75
2653	100.75
2652	100.75
2651	100.75
2650	100.76
2649	100.76
2648	100.76
2647	100.75
2646	100.75
2645	100.75
2644	100.76
2643	100.77
2642	100.77
2641	100.77
2640	100.77
2639	100.77
2638	100.77
2637	100.78
2636	100.78
2635	100.79
2634	100.8
2633	100.8
2632	100.8
2631	100.8
2630	100.8
2629	100.8
2628	100.8
2627	100.8
2626	100.81
2625	100.82
2624	100.84
2623	100.85
2622	100.85
2621	100.86
2620	100.87
2619	100.87
2618	100.87
2617	100.87
2616	100.87
2615	100.87
2614	100.88
2613	100.89
2612	100.89
2611	100.9
2610	100.9
2609	100.9
2608	100.91
2607	100.91
2606	100.91
2605	100.92
2604	100.93
2603	100.94
2602	100.94
2601	100.93
2600	100.93
2599	100.92
2598	100.92
2597	100.93
2596	100.94
2595	100.94
2594	100.94
2593	100.95
2592	100.96
2591	100.96
2590	100.96
2589	100.96
2588	100.96
2587	100.96
2586	100.96
2585	100.96
2584	100.97
2583	100.98
2582	100.99
2581	100.99
2580	100.99
2579	100.99
2578	100.99
2577	100.99
2576	100.99
2575	100.99
2574	100.99
2573	101
2572	101
2571	101.01
2570	101
2569	101
2568	101.01
2567	101.02
2566	101.03
2565	101.04
2564	101.04
2563	101.04
2562	101.04
2561	101.05
2560	101.05
2559	101.05
2558	101.04
2557	101.03
2556	101.03
2555	101.03
2554	101.04
2553	101.05
2552	101.07
2551	101.08
2550	101.09
2549	101.09
2548	101.08
2547	101.07
2546	101.07
2545	101.08
2544	101.08
2543	101.08
2542	101.07
2541	101.08
2540	101.1
2539	101.11
2538	101.11
2537	101.11
2536	101.1
2535	101.09
2534	101.09
2533	101.08
2532	101.09
2531	101.1
2530	101.11
2529	101.11
2528	101.1
2527	101.09
2526	101.09
2525	101.09
2524	101.09
2523	101.09
2522	101.09
2521	101.1
2520	101.12
2519	101.13
2518	101.13
2517	101.13
2516	101.13
2515	101.12
2514	101.11
2513	101.11
2512	101.11
2511	101.11
2510	101.12
2509	101.11
2508	101.11
2507	101.11
2506	101.12
2505	101.13
2504	101.13
2503	101.14
2502	101.13
2501	101.13
2500	101.13
2499	101.13
2498	101.12
2497	101.12
2496	101.12
2495	101.13
2494	101.15
2493	101.15
2492	101.15
2491	101.14
2490	101.14
2489	101.14
2488	101.16
2487	101.16
2486	101.17
2485	101.17
2484	101.17
2483	101.17
2482	101.18
2481	101.17
2480	101.17
2479	101.17
2478	101.17
2477	101.17
2476	101.16
2475	101.16
2474	101.17
2473	101.19
2472	101.2
2471	101.2
2470	101.2
2469	101.19
2468	101.18
2467	101.16
2466	101.15
2465	101.15
2464	101.16
2463	101.16
2462	101.16
2461	101.16
2460	101.15
2459	101.15
2458	101.14
2457	101.13
2456	101.12
2455	101.11
2454	101.11
2453	101.12
2452	101.13
2451	101.14
2450	101.15
2449	101.15
2448	101.16
2447	101.16
2446	101.16
2445	101.16
2444	101.17
2443	101.17
2442	101.17
2441	101.16
2440	101.16
2439	101.16
2438	101.17
2437	101.17
2436	101.18
2435	101.17
2434	101.16
2433	101.16
2432	101.17
2431	101.19
2430	101.2
2429	101.21
2428	101.21
2427	101.22
2426	101.21
2425	101.2
2424	101.2
2423	101.19
2422	101.19
2421	101.2
2420	101.2
2419	101.2
2418	101.21
2417	101.22
2416	101.23
2415	101.24
2414	101.23
2413	101.23
2412	101.23
2411	101.22
2410	101.22
2409	101.24
2408	101.26
2407	101.29
2406	101.3
2405	101.3
2404	101.3
2403	101.3
2402	101.3
2401	101.29
2400	101.29
2399	101.29
2398	101.29
2397	101.29
2396	101.28
2395	101.28
2394	101.29
2393	101.29
2392	101.29
2391	101.28
2390	101.28
2389	101.27
2388	101.27
2387	101.27
2386	101.27
2385	101.28
2384	101.28
2383	101.28
2382	101.28
2381	101.29
2380	101.3
2379	101.31
2378	101.31
2377	101.32
2376	101.33
2375	101.33
2374	101.34
2373	101.33
2372	101.33
2371	101.32
2370	101.31
2369	101.31
2368	101.31
2367	101.3
2366	101.28
2365	101.26
2364	101.27
2363	101.32
2362	101.36
2361	101.42
2360	101.48
2359	101.54
2358	101.6
2357	101.64
2356	101.63
2355	101.48
2354	101.24
2353	101.1
2352	101.19
2351	101.47
2350	101.69
2349	101.63
2348	101.24
2347	100.8
2346	100.6
2345	100.67
2344	100.86
2343	101.04
2342	101.17
2341	101.27
2340	101.34
2339	101.38
2338	101.41
2337	101.45
2336	101.51
2335	101.55
2334	101.53
2333	101.49
2332	101.44
2331	101.43
2330	101.44
2329	101.47
2328	101.44
2327	101.34
2326	101.19
2325	101.04
2324	100.94
2323	100.92
2322	100.94
2321	100.98
2320	101.03
2319	101.09
2318	101.13
2317	101.15
2316	101.12
2315	101.09
2314	101.05
2313	101.04
2312	101.02
2311	101.01
2310	100.99
2309	100.97
2308	100.94
2307	100.92
2306	100.9
2305	100.88
2304	100.86
2303	100.85
2302	100.83
2301	100.83
2300	100.83
2299	100.83
2298	100.83
2297	100.82
2296	100.81
2295	100.8
2294	100.79
2293	100.78
2292	100.76
2291	100.75
2290	100.73
2289	100.71
2288	100.69
2287	100.67
2286	100.66
2285	100.67
2284	100.68
2283	100.7
2282	100.71
2281	100.72
2280	100.72
2279	100.72
2278	100.73
2277	100.75
2276	100.76
2275	100.78
2274	100.78
2273	100.78
2272	100.77
2271	100.76
2270	100.76
2269	100.77
2268	100.8
2267	100.84
2266	100.89
2265	100.92
2264	100.93
2263	100.92
2262	100.9
2261	100.89
2260	100.87
2259	100.85
2258	100.86
2257	100.87
2256	100.9
2255	100.92
2254	100.93
2253	100.93
2252	100.91
2251	100.89
2250	100.89
2249	100.91
2248	100.93
2247	100.93
2246	100.92
2245	100.9
2244	100.88
2243	100.87
2242	100.87
2241	100.88
2240	100.88
2239	100.88
2238	100.87
2237	100.86
2236	100.84
2235	100.85
2234	100.88
2233	100.93
2232	100.98
2231	101
2230	101
2229	100.98
2228	100.93
2227	100.89
2226	100.87
2225	100.88
2224	100.89
2223	100.89
2222	100.88
2221	100.88
2220	100.87
2219	100.87
2218	100.87
2217	100.87
2216	100.86
2215	100.84
2214	100.81
2213	100.8
2212	100.8
2211	100.79
2210	100.79
2209	100.81
2208	100.84
2207	100.88
2206	100.91
2205	100.91
2204	100.88
2203	100.84
2202	100.81
2201	100.81
2200	100.83
2199	100.85
2198	100.86
2197	100.86
2196	100.84
2195	100.82
2194	100.8
2193	100.79
2192	100.78
2191	100.76
2190	100.75
2189	100.75
2188	100.73
2187	100.72
2186	100.72
2185	100.74
2184	100.78
2183	100.84
2182	100.91
2181	100.94
2180	100.93
2179	100.88
2178	100.84
2177	100.84
2176	100.87
2175	100.9
2174	100.9
2173	100.87
2172	100.8
2171	100.71
2170	100.61
2169	100.51
2168	100.41
2167	100.34
2166	100.32
2165	100.32
2164	100.27
2163	100.2
2162	100.22
2161	100.44
2160	100.89
2159	101.42
2158	101.85
2157	102.03
2156	101.98
2155	101.82
2154	101.66
2153	101.55
2152	101.49
2151	101.47
2150	101.49
2149	101.53
2148	101.54
2147	101.52
2146	101.48
2145	101.44
2144	101.43
2143	101.44
2142	101.49
2141	101.53
2140	101.54
2139	101.5
2138	101.46
2137	101.46
2136	101.5
2135	101.59
2134	101.69
2133	101.74
2132	101.72
2131	101.65
2130	101.57
2129	101.51
2128	101.47
2127	101.44
2126	101.41
2125	101.37
2124	101.32
2123	101.26
2122	101.21
2121	101.18
2120	101.16
2119	101.15
2118	101.13
2117	101.11
2116	101.07
2115	101.02
2114	100.98
2113	100.96
2112	100.96
2111	100.96
2110	100.96
2109	100.97
2108	100.98
2107	101
2106	101.03
2105	101.04
2104	101.02
2103	100.99
2102	100.96
2101	100.97
2100	100.98
2099	101
2098	101.04
2097	101.09
2096	101.15
2095	101.19
2094	101.22
2093	101.21
2092	101.16
2091	101.09
2090	101.04
2089	101.02
2088	101.02
2087	101.01
2086	100.99
2085	100.95
2084	100.9
2083	100.84
2082	100.79
2081	100.75
2080	100.72
2079	100.71
2078	100.72
2077	100.76
2076	100.81
2075	100.84
2074	100.85
2073	100.85
2072	100.83
2071	100.79
2070	100.75
2069	100.73
2068	100.73
2067	100.75
2066	100.78
2065	100.82
2064	100.84
2063	100.83
2062	100.82
2061	100.81
2060	100.79
2059	100.76
2058	100.72
2057	100.68
2056	100.65
2055	100.61
2054	100.55
2053	100.45
2052	100.3
2051	100.21
2050	100.23
2049	100.35
2048	100.49
2047	100.57
2046	100.59
2045	100.58
2044	100.54
2043	100.48
2042	100.43
2041	100.42
2040	100.42
2039	100.39
2038	100.37
2037	100.38
2036	100.42
2035	100.47
2034	100.56
2033	100.66
2032	100.72
2031	100.74
2030	100.74
2029	100.76
2028	100.78
2027	100.78
2026	100.78
2025	100.78
2024	100.77
2023	100.73
2022	100.71
2021	100.73
2020	100.77
2019	100.8
2018	100.83
2017	100.86
2016	100.87
2015	100.84
2014	100.79
2013	100.72
2012	100.64
2011	100.58
2010	100.62
2009	100.75
2008	100.94
2007	101.1
2006	101.19
2005	101.22
2004	101.19
2003	101.13
[truncated: 1,603 more rows]

## Sheet: PVC
Created as New Dataset	polyvinyl chloride (PVC)
cm-1
4000	100.42
3999	100.42
3998	100.42
3997	100.42
3996	100.41
3995	100.39
3994	100.37
3993	100.36
3992	100.37
3991	100.38
3990	100.4
3989	100.41
3988	100.42
3987	100.42
3986	100.42
3985	100.41
3984	100.41
3983	100.4
3982	100.4
3981	100.39
3980	100.37
3979	100.36
3978	100.35
3977	100.34
3976	100.34
3975	100.34
3974	100.34
3973	100.34
3972	100.34
3971	100.35
3970	100.37
3969	100.39
3968	100.39
3967	100.37
3966	100.34
3965	100.32
3964	100.31
3963	100.32
3962	100.32
3961	100.32
3960	100.33
3959	100.35
3958	100.36
3957	100.36
3956	100.34
3955	100.31
3954	100.26
3953	100.19
3952	100.12
3951	100.07
3950	100.07
3949	100.08
3948	100.07
3947	100.05
3946	100.05
3945	100.1
3944	100.17
3943	100.2
3942	100.17
3941	100.17
3940	100.24
3939	100.33
3938	100.34
3937	100.25
3936	100.12
3935	100.03
3934	100.02
3933	100.05
3932	100.09
3931	100.1
3930	100.08
3929	100.04
3928	100.01
3927	100.03
3926	100.06
3925	100.02
3924	99.92
3923	99.84
3922	99.84
3921	99.87
3920	99.9
3919	99.96
3918	100.08
3917	100.19
3916	100.25
3915	100.29
3914	100.38
3913	100.47
3912	100.48
3911	100.4
3910	100.21
3909	99.96
3908	99.67
3907	99.42
3906	99.23
3905	99.11
3904	99.02
3903	99.01
3902	99.2
3901	99.55
3900	99.86
3899	99.96
3898	99.93
3897	99.91
3896	99.92
3895	99.91
3894	99.92
3893	100.01
3892	100.07
3891	99.87
3890	99.53
3889	99.44
3888	99.66
3887	99.93
3886	99.94
3885	99.63
3884	99.34
3883	99.41
3882	99.74
3881	99.97
3880	99.88
3879	99.63
3878	99.57
3877	99.76
3876	99.9
3875	99.74
3874	99.32
3873	98.99
3872	99.09
3871	99.44
3870	99.55
3869	99.27
3868	99.1
3867	99.35
3866	99.7
3865	99.82
3864	99.77
3863	99.71
3862	99.75
3861	99.81
3860	99.77
3859	99.55
3858	99.17
3857	98.69
3856	98.35
3855	98.49
3854	99.03
3853	99.11
3852	98.69
3851	98.79
3850	99.43
3849	99.97
3848	100.16
3847	100.13
3846	100.01
3845	99.82
3844	99.56
3843	99.22
3842	98.94
3841	98.85
3840	98.98
3839	99.16
3838	99.23
3837	99.18
3836	99.16
3835	99.33
3834	99.64
3833	99.9
3832	99.99
3831	99.92
3830	99.86
3829	99.93
3828	100.05
3827	99.97
3826	99.62
3825	99.22
3824	99.08
3823	99.25
3822	99.49
3821	99.35
3820	98.87
3819	98.82
3818	99.38
3817	99.99
3816	100.14
3815	99.87
3814	99.76
3813	99.99
3812	100.18
3811	100.09
3810	99.91
3809	99.9
3808	99.99
3807	99.82
3806	99.33
3805	99.02
3804	99.2
3803	99.61
3802	99.81
3801	99.5
3800	99.09
3799	99.21
3798	99.72
3797	100.1
3796	100.16
3795	100.11
3794	100.18
3793	100.36
3792	100.48
3791	100.48
3790	100.4
3789	100.3
3788	100.22
3787	100.2
3786	100.21
3785	100.15
3784	100
3783	99.87
3782	99.89
3781	100.02
3780	100.14
3779	100.12
3778	100.05
3777	100.11
3776	100.24
3775	100.25
3774	100.1
3773	99.94
3772	99.92
3771	99.96
3770	99.89
3769	99.74
3768	99.73
3767	99.94
3766	100.14
3765	100.09
3764	99.9
3763	99.81
3762	99.83
3761	99.84
3760	99.79
3759	99.7
3758	99.57
3757	99.4
3756	99.21
3755	99.01
3754	98.77
3753	98.61
3752	98.71
3751	98.96
3750	98.93
3749	98.62
3748	98.48
3747	98.77
3746	99.34
3745	99.78
3744	99.58
3743	99.07
3742	99.09
3741	99.44
3740	99.47
3739	99.15
3738	98.81
3737	98.69
3736	98.75
3735	98.91
3734	99.17
3733	99.5
3732	99.7
3731	99.72
3730	99.73
3729	99.84
3728	99.95
3727	99.92
3726	99.78
3725	99.7
3724	99.76
3723	99.86
3722	99.91
3721	99.93
3720	100
3719	100.07
3718	100.05
3717	99.87
3716	99.64
3715	99.45
3714	99.33
3713	99.34
3712	99.44
3711	99.52
3710	99.56
3709	99.69
3708	99.91
3707	100.09
3706	100.15
3705	100.15
3704	100.15
3703	100.19
3702	100.19
3701	100.1
3700	100.02
3699	100.09
3698	100.23
3697	100.25
3696	100.09
3695	99.84
3694	99.57
3693	99.28
3692	99.06
3691	99.06
3690	99.3
3689	99.52
3688	99.52
3687	99.56
3686	99.84
3685	100.21
3684	100.37
3683	100.3
3682	100.12
3681	99.84
3680	99.4
3679	98.88
3678	98.61
3677	98.79
3676	99.11
3675	98.91
3674	98.5
3673	98.67
3672	99.26
3671	99.76
3670	99.9
3669	99.73
3668	99.68
3667	99.97
3666	100.34
3665	100.52
3664	100.55
3663	100.5
3662	100.38
3661	100.18
3660	99.96
3659	99.86
3658	99.94
3657	100.04
3656	99.9
3655	99.53
3654	99.19
3653	98.92
3652	98.62
3651	98.42
3650	98.55
3649	98.83
3648	98.99
3647	99.11
3646	99.38
3645	99.79
3644	100.16
3643	100.38
3642	100.43
3641	100.39
3640	100.35
3639	100.32
3638	100.24
3637	100.15
3636	100.11
3635	100.04
3634	99.79
3633	99.4
3632	99.1
3631	99.1
3630	99.45
3629	99.78
3628	99.69
3627	99.61
3626	99.92
3625	100.23
3624	100.24
3623	100.01
3622	99.78
3621	99.68
3620	99.67
3619	99.59
3618	99.4
3617	99.31
3616	99.41
3615	99.58
3614	99.66
3613	99.63
3612	99.57
3611	99.63
3610	99.83
3609	100.04
3608	100.13
3607	100.13
3606	100.15
3605	100.21
3604	100.26
3603	100.25
3602	100.2
3601	100.12
3600	100.01
3599	99.92
3598	99.88
3597	99.88
3596	99.93
3595	99.97
3594	99.95
3593	99.87
3592	99.75
3591	99.65
3590	99.58
3589	99.62
3588	99.74
3587	99.8
3586	99.83
3585	99.95
3584	100.15
3583	100.31
3582	100.38
3581	100.38
3580	100.37
3579	100.36
3578	100.35
3577	100.35
3576	100.35
3575	100.35
3574	100.31
3573	100.19
3572	99.97
3571	99.69
3570	99.43
3569	99.29
3568	99.35
3567	99.49
3566	99.58
3565	99.68
3564	99.87
3563	100.06
3562	100.19
3561	100.26
3560	100.31
3559	100.35
3558	100.36
3557	100.32
3556	100.27
3555	100.22
3554	100.21
3553	100.19
3552	100.14
3551	100.06
3550	99.98
3549	99.94
3548	99.92
3547	99.93
3546	99.97
3545	100.04
3544	100.14
3543	100.23
3542	100.31
3541	100.35
3540	100.35
3539	100.33
3538	100.32
3537	100.32
3536	100.32
3535	100.32
3534	100.32
3533	100.31
3532	100.27
3531	100.21
3530	100.15
3529	100.09
3528	100.03
3527	99.97
3526	99.96
3525	100.02
3524	100.11
3523	100.19
3522	100.23
3521	100.27
3520	100.32
3519	100.37
3518	100.39
3517	100.38
3516	100.37
3515	100.36
3514	100.32
3513	100.27
3512	100.24
3511	100.23
3510	100.23
3509	100.22
3508	100.2
3507	100.17
3506	100.14
3505	100.11
3504	100.09
3503	100.09
3502	100.11
3501	100.16
3500	100.23
3499	100.27
3498	100.3
3497	100.3
3496	100.3
3495	100.29
3494	100.29
3493	100.3
3492	100.3
3491	100.3
3490	100.29
3489	100.29
3488	100.27
3487	100.26
3486	100.24
3485	100.23
3484	100.24
3483	100.23
3482	100.22
3481	100.21
3480	100.22
3479	100.26
3478	100.3
3477	100.32
3476	100.34
3475	100.33
3474	100.31
3473	100.29
3472	100.27
3471	100.24
3470	100.22
3469	100.21
3468	100.22
3467	100.23
3466	100.24
3465	100.25
3464	100.25
3463	100.25
3462	100.24
3461	100.24
3460	100.25
3459	100.28
3458	100.31
3457	100.33
3456	100.34
3455	100.33
3454	100.32
3453	100.31
3452	100.29
3451	100.25
3450	100.21
3449	100.19
3448	100.18
3447	100.16
3446	100.15
3445	100.17
3444	100.22
3443	100.27
3442	100.29
3441	100.28
3440	100.27
3439	100.27
3438	100.26
3437	100.25
3436	100.24
3435	100.24
3434	100.25
3433	100.26
3432	100.26
3431	100.25
3430	100.25
3429	100.26
3428	100.28
3427	100.29
3426	100.29
3425	100.27
3424	100.24
3423	100.23
3422	100.22
3421	100.22
3420	100.23
3419	100.25
3418	100.27
3417	100.29
3416	100.3
3415	100.29
3414	100.28
3413	100.28
3412	100.27
3411	100.27
3410	100.27
3409	100.27
3408	100.28
3407	100.28
3406	100.28
3405	100.27
3404	100.25
3403	100.22
3402	100.2
3401	100.19
3400	100.2
3399	100.22
3398	100.23
3397	100.22
3396	100.21
3395	100.19
3394	100.19
3393	100.19
3392	100.19
3391	100.21
3390	100.24
3389	100.27
3388	100.28
3387	100.29
3386	100.28
3385	100.28
3384	100.28
3383	100.28
3382	100.27
3381	100.27
3380	100.27
3379	100.27
3378	100.27
3377	100.28
3376	100.29
3375	100.3
3374	100.29
3373	100.27
3372	100.23
3371	100.19
3370	100.17
3369	100.15
3368	100.16
3367	100.17
3366	100.19
3365	100.21
3364	100.21
3363	100.21
3362	100.22
3361	100.22
3360	100.23
3359	100.25
3358	100.26
3357	100.27
3356	100.27
3355	100.26
3354	100.24
3353	100.22
3352	100.21
3351	100.22
3350	100.23
3349	100.26
3348	100.28
3347	100.29
3346	100.28
3345	100.27
3344	100.26
3343	100.24
3342	100.23
3341	100.2
3340	100.18
3339	100.18
3338	100.19
3337	100.22
3336	100.25
3335	100.27
3334	100.29
3333	100.3
3332	100.3
3331	100.29
3330	100.28
3329	100.26
3328	100.24
3327	100.23
3326	100.23
3325	100.24
3324	100.27
3323	100.29
3322	100.31
3321	100.31
3320	100.32
3319	100.32
3318	100.31
3317	100.29
3316	100.27
3315	100.26
3314	100.25
3313	100.23
3312	100.21
3311	100.18
3310	100.16
3309	100.14
3308	100.13
3307	100.14
3306	100.16
3305	100.19
3304	100.23
3303	100.25
3302	100.27
3301	100.27
3300	100.26
3299	100.24
3298	100.21
3297	100.18
3296	100.17
3295	100.16
3294	100.17
3293	100.18
3292	100.21
3291	100.24
3290	100.27
3289	100.29
3288	100.3
3287	100.3
3286	100.3
3285	100.3
3284	100.3
3283	100.29
3282	100.29
3281	100.29
3280	100.28
3279	100.28
3278	100.26
3277	100.24
3276	100.21
3275	100.2
3274	100.19
3273	100.18
3272	100.18
3271	100.2
3270	100.23
3269	100.27
3268	100.3
3267	100.32
3266	100.33
3265	100.33
3264	100.34
3263	100.34
3262	100.35
3261	100.34
3260	100.33
3259	100.32
3258	100.29
3257	100.27
3256	100.27
3255	100.29
3254	100.31
3253	100.33
3252	100.33
3251	100.32
3250	100.29
3249	100.26
3248	100.24
3247	100.24
3246	100.26
3245	100.29
3244	100.31
3243	100.33
3242	100.34
3241	100.35
3240	100.35
3239	100.34
3238	100.32
3237	100.3
3236	100.28
3235	100.26
3234	100.26
3233	100.28
3232	100.31
3231	100.33
3230	100.35
3229	100.37
3228	100.38
3227	100.39
3226	100.39
3225	100.39
3224	100.38
3223	100.38
3222	100.36
3221	100.35
3220	100.35
3219	100.35
3218	100.35
3217	100.36
3216	100.36
3215	100.37
3214	100.37
3213	100.37
3212	100.38
3211	100.39
3210	100.39
3209	100.39
3208	100.39
3207	100.4
3206	100.41
3205	100.42
3204	100.42
3203	100.41
3202	100.41
3201	100.41
3200	100.41
3199	100.41
3198	100.41
3197	100.4
3196	100.41
3195	100.41
3194	100.42
3193	100.42
3192	100.42
3191	100.42
3190	100.42
3189	100.43
3188	100.44
3187	100.45
3186	100.45
3185	100.45
3184	100.44
3183	100.43
3182	100.43
3181	100.43
3180	100.44
3179	100.44
3178	100.45
3177	100.45
3176	100.46
3175	100.48
3174	100.49
3173	100.49
3172	100.49
3171	100.48
3170	100.48
3169	100.48
3168	100.48
3167	100.49
3166	100.49
3165	100.49
3164	100.5
3163	100.5
3162	100.5
3161	100.49
3160	100.49
3159	100.48
3158	100.47
3157	100.46
3156	100.44
3155	100.41
3154	100.39
3153	100.39
3152	100.4
3151	100.42
3150	100.45
3149	100.47
3148	100.48
3147	100.48
3146	100.49
3145	100.49
3144	100.48
3143	100.47
3142	100.44
3141	100.42
3140	100.42
3139	100.43
3138	100.46
3137	100.48
3136	100.49
3135	100.49
3134	100.48
3133	100.48
3132	100.46
3131	100.45
3130	100.45
3129	100.46
3128	100.46
3127	100.46
3126	100.45
3125	100.43
3124	100.41
3123	100.38
3122	100.35
3121	100.33
3120	100.32
3119	100.31
3118	100.31
3117	100.33
3116	100.35
3115	100.38
3114	100.42
3113	100.44
3112	100.45
3111	100.44
3110	100.43
3109	100.43
3108	100.44
3107	100.46
3106	100.47
3105	100.48
3104	100.47
3103	100.46
3102	100.44
3101	100.43
3100	100.43
3099	100.44
3098	100.47
3097	100.49
3096	100.5
3095	100.5
3094	100.5
3093	100.48
3092	100.47
3091	100.45
3090	100.45
3089	100.44
3088	100.43
3087	100.42
3086	100.41
3085	100.4
3084	100.4
3083	100.4
3082	100.39
3081	100.38
3080	100.37
3079	100.38
3078	100.4
3077	100.44
3076	100.47
3075	100.5
3074	100.51
3073	100.5
3072	100.49
3071	100.48
3070	100.45
3069	100.43
3068	100.41
3067	100.42
3066	100.44
3065	100.46
3064	100.48
3063	100.5
3062	100.51
3061	100.52
3060	100.51
3059	100.5
3058	100.48
3057	100.47
3056	100.47
3055	100.46
3054	100.46
3053	100.46
3052	100.45
3051	100.45
3050	100.46
3049	100.47
3048	100.48
3047	100.48
3046	100.47
3045	100.47
3044	100.45
3043	100.45
3042	100.44
3041	100.45
3040	100.47
3039	100.48
3038	100.48
3037	100.46
3036	100.43
3035	100.41
3034	100.4
3033	100.41
3032	100.42
3031	100.44
3030	100.46
3029	100.48
3028	100.49
3027	100.5
3026	100.49
3025	100.48
3024	100.47
3023	100.47
3022	100.47
3021	100.46
3020	100.44
3019	100.43
3018	100.42
3017	100.41
3016	100.4
3015	100.4
3014	100.4
3013	100.4
3012	100.41
3011	100.43
3010	100.46
3009	100.48
3008	100.48
3007	100.48
3006	100.46
3005	100.45
3004	100.44
3003	100.43
3002	100.43
3001	100.42
3000	100.4
2999	100.37
2998	100.35
2997	100.34
2996	100.33
2995	100.32
2994	100.3
2993	100.29
2992	100.27
2991	100.26
2990	100.24
2989	100.22
2988	100.19
2987	100.16
2986	100.13
2985	100.08
2984	100.03
2983	99.97
2982	99.92
2981	99.87
2980	99.84
2979	99.81
2978	99.79
2977	99.75
2976	99.72
2975	99.69
2974	99.67
2973	99.66
2972	99.65
2971	99.64
2970	99.63
2969	99.63
2968	99.62
2967	99.62
2966	99.61
2965	99.61
2964	99.61
2963	99.62
2962	99.63
2961	99.65
2960	99.67
2959	99.69
2958	99.71
2957	99.71
2956	99.71
2955	99.71
2954	99.7
2953	99.7
2952	99.71
2951	99.71
2950	99.7
2949	99.68
2948	99.65
2947	99.62
2946	99.6
2945	99.58
2944	99.57
2943	99.56
2942	99.55
2941	99.53
2940	99.51
2939	99.48
2938	99.46
2937	99.43
2936	99.41
2935	99.38
2934	99.35
2933	99.32
2932	99.29
2931	99.25
2930	99.21
2929	99.19
2928	99.17
2927	99.16
2926	99.15
2925	99.14
2924	99.12
2923	99.09
2922	99.06
2921	99.03
2920	98.99
2919	98.94
2918	98.9
2917	98.87
2916	98.84
2915	98.81
2914	98.8
2913	98.8
2912	98.81
2911	98.83
2910	98.85
2909	98.88
2908	98.91
2907	98.95
2906	98.98
2905	99.02
2904	99.07
2903	99.13
2902	99.2
2901	99.28
2900	99.36
2899	99.44
2898	99.5
2897	99.56
2896	99.62
2895	99.69
2894	99.75
2893	99.81
2892	99.86
2891	99.91
2890	99.95
2889	99.98
2888	100.01
2887	100.03
2886	100.04
2885	100.05
2884	100.06
2883	100.07
2882	100.08
2881	100.09
2880	100.11
2879	100.11
2878	100.1
2877	100.09
2876	100.07
2875	100.06
2874	100.06
2873	100.06
2872	100.07
2871	100.08
2870	100.08
2869	100.08
2868	100.09
2867	100.09
2866	100.1
2865	100.1
2864	100.09
2863	100.08
2862	100.07
2861	100.07
2860	100.07
2859	100.08
2858	100.07
2857	100.06
2856	100.05
2855	100.03
2854	100.01
2853	99.99
2852	99.97
2851	99.95
2850	99.95
2849	99.95
2848	99.98
2847	100.02
2846	100.06
2845	100.1
2844	100.13
2843	100.14
2842	100.14
2841	100.14
2840	100.15
2839	100.17
2838	100.19
2837	100.21
2836	100.23
2835	100.25
2834	100.26
2833	100.27
2832	100.28
2831	100.28
2830	100.28
2829	100.29
2828	100.29
2827	100.3
2826	100.29
2825	100.29
2824	100.28
2823	100.28
2822	100.28
2821	100.27
2820	100.27
2819	100.27
2818	100.27
2817	100.27
2816	100.28
2815	100.28
2814	100.28
2813	100.29
2812	100.29
2811	100.3
2810	100.31
2809	100.33
2808	100.35
2807	100.37
2806	100.39
2805	100.4
2804	100.4
2803	100.4
2802	100.39
2801	100.38
2800	100.38
2799	100.38
2798	100.39
2797	100.4
2796	100.41
2795	100.43
2794	100.43
2793	100.44
2792	100.43
2791	100.43
2790	100.42
2789	100.43
2788	100.44
2787	100.46
2786	100.47
2785	100.48
2784	100.48
2783	100.48
2782	100.48
2781	100.48
2780	100.48
2779	100.48
2778	100.47
2777	100.46
2776	100.45
2775	100.45
2774	100.45
2773	100.47
2772	100.48
2771	100.49
2770	100.5
2769	100.5
2768	100.49
2767	100.49
2766	100.49
2765	100.5
2764	100.5
2763	100.5
2762	100.51
2761	100.51
2760	100.5
2759	100.5
2758	100.49
2757	100.49
2756	100.49
2755	100.5
2754	100.5
2753	100.5
2752	100.49
2751	100.48
2750	100.47
2749	100.47
2748	100.48
2747	100.49
2746	100.49
2745	100.5
2744	100.5
2743	100.5
2742	100.5
2741	100.51
2740	100.51
2739	100.5
2738	100.5
2737	100.5
2736	100.5
2735	100.51
2734	100.51
2733	100.52
2732	100.53
2731	100.53
2730	100.52
2729	100.51
2728	100.5
2727	100.49
2726	100.49
2725	100.49
2724	100.5
2723	100.5
2722	100.51
2721	100.52
2720	100.53
2719	100.54
2718	100.54
2717	100.53
2716	100.53
2715	100.53
2714	100.53
2713	100.53
2712	100.53
2711	100.53
2710	100.53
2709	100.53
2708	100.53
2707	100.53
2706	100.54
2705	100.54
2704	100.54
2703	100.54
2702	100.54
2701	100.54
2700	100.54
2699	100.54
2698	100.54
2697	100.54
2696	100.54
2695	100.54
2694	100.55
2693	100.56
2692	100.56
2691	100.55
2690	100.55
2689	100.54
2688	100.53
2687	100.53
2686	100.53
2685	100.53
2684	100.53
2683	100.53
2682	100.53
2681	100.53
2680	100.53
2679	100.54
2678	100.55
2677	100.55
2676	100.55
2675	100.55
2674	100.55
2673	100.55
2672	100.55
2671	100.55
2670	100.54
2669	100.54
2668	100.54
2667	100.53
2666	100.51
2665	100.5
2664	100.48
2663	100.46
2662	100.44
2661	100.42
2660	100.4
2659	100.39
2658	100.38
2657	100.38
2656	100.37
2655	100.37
2654	100.36
2653	100.36
2652	100.35
2651	100.35
2650	100.34
2649	100.33
2648	100.33
2647	100.33
2646	100.33
2645	100.33
2644	100.33
2643	100.33
2642	100.33
2641	100.34
2640	100.34
2639	100.34
2638	100.35
2637	100.35
2636	100.35
2635	100.36
2634	100.36
2633	100.36
2632	100.36
2631	100.36
2630	100.36
2629	100.36
2628	100.36
2627	100.36
2626	100.35
2625	100.36
2624	100.36
2623	100.37
2622	100.38
2621	100.39
2620	100.39
2619	100.39
2618	100.39
2617	100.39
2616	100.39
2615	100.4
2614	100.4
2613	100.4
2612	100.4
2611	100.41
2610	100.41
2609	100.41
2608	100.41
2607	100.41
2606	100.41
2605	100.41
2604	100.43
2603	100.44
2602	100.45
2601	100.46
2600	100.46
2599	100.46
2598	100.46
2597	100.46
2596	100.46
2595	100.47
2594	100.47
2593	100.47
2592	100.48
2591	100.48
2590	100.48
2589	100.49
2588	100.49
2587	100.49
2586	100.49
2585	100.48
2584	100.48
2583	100.47
2582	100.46
2581	100.46
2580	100.46
2579	100.48
2578	100.49
2577	100.5
2576	100.5
2575	100.5
2574	100.5
2573	100.5
2572	100.5
2571	100.5
2570	100.5
2569	100.49
2568	100.5
2567	100.51
2566	100.52
2565	100.53
2564	100.53
2563	100.53
2562	100.53
2561	100.53
2560	100.53
2559	100.53
2558	100.52
2557	100.51
2556	100.51
2555	100.51
2554	100.51
2553	100.52
2552	100.52
2551	100.52
2550	100.53
2549	100.53
2548	100.53
2547	100.53
2546	100.53
2545	100.53
2544	100.54
2543	100.53
2542	100.53
2541	100.54
2540	100.55
2539	100.57
2538	100.57
2537	100.56
2536	100.55
2535	100.54
2534	100.53
2533	100.53
2532	100.54
2531	100.55
2530	100.57
2529	100.57
2528	100.57
2527	100.55
2526	100.54
2525	100.53
2524	100.53
2523	100.53
2522	100.53
2521	100.54
2520	100.55
2519	100.56
2518	100.56
2517	100.56
2516	100.56
2515	100.56
2514	100.56
2513	100.56
2512	100.56
2511	100.57
2510	100.57
2509	100.57
2508	100.56
2507	100.56
2506	100.56
2505	100.58
2504	100.58
2503	100.59
2502	100.59
2501	100.59
2500	100.59
2499	100.59
2498	100.6
2497	100.6
2496	100.6
2495	100.6
2494	100.61
2493	100.62
2492	100.61
2491	100.61
2490	100.6
2489	100.6
2488	100.61
2487	100.63
2486	100.66
2485	100.67
2484	100.68
2483	100.67
2482	100.67
2481	100.66
2480	100.65
2479	100.64
2478	100.64
2477	100.64
2476	100.63
2475	100.63
2474	100.63
2473	100.63
2472	100.63
2471	100.62
2470	100.62
2469	100.62
2468	100.61
2467	100.61
2466	100.62
2465	100.63
2464	100.64
2463	100.63
2462	100.62
2461	100.61
2460	100.6
2459	100.61
2458	100.62
2457	100.61
2456	100.6
2455	100.59
2454	100.58
2453	100.58
2452	100.58
2451	100.6
2450	100.61
2449	100.61
2448	100.62
2447	100.61
2446	100.61
2445	100.61
2444	100.62
2443	100.63
2442	100.63
2441	100.62
2440	100.61
2439	100.61
2438	100.62
2437	100.63
2436	100.64
2435	100.63
2434	100.62
2433	100.62
2432	100.62
2431	100.64
2430	100.65
2429	100.66
2428	100.66
2427	100.67
2426	100.67
2425	100.67
2424	100.67
2423	100.66
2422	100.67
2421	100.67
2420	100.68
2419	100.7
2418	100.71
2417	100.71
2416	100.7
2415	100.7
2414	100.7
2413	100.71
2412	100.71
2411	100.71
2410	100.71
2409	100.72
2408	100.74
2407	100.76
2406	100.77
2405	100.77
2404	100.77
2403	100.76
2402	100.76
2401	100.77
2400	100.77
2399	100.77
2398	100.76
2397	100.76
2396	100.76
2395	100.76
2394	100.76
2393	100.77
2392	100.77
2391	100.77
2390	100.76
2389	100.76
2388	100.77
2387	100.77
2386	100.78
2385	100.8
2384	100.83
2383	100.86
2382	100.9
2381	100.93
2380	100.93
2379	100.92
2378	100.88
2377	100.83
2376	100.8
2375	100.79
2374	100.8
2373	100.82
2372	100.85
2371	100.88
2370	100.91
2369	100.93
2368	100.94
2367	100.92
2366	100.87
2365	100.81
2364	100.77
2363	100.78
2362	100.79
2361	100.8
2360	100.81
2359	100.83
2358	100.9
2357	100.98
2356	101.06
2355	101.14
2354	101.21
2353	101.18
2352	101.04
2351	100.86
2350	100.73
2349	100.72
2348	100.8
2347	100.82
2346	100.69
2345	100.51
2344	100.43
2343	100.45
2342	100.52
2341	100.59
2340	100.62
2339	100.63
2338	100.63
2337	100.63
2336	100.66
2335	100.72
2334	100.8
2333	100.86
2332	100.84
2331	100.76
2330	100.66
2329	100.56
2328	100.45
2327	100.34
2326	100.25
2325	100.19
2324	100.16
2323	100.16
2322	100.16
2321	100.14
2320	100.12
2319	100.12
2318	100.15
2317	100.22
2316	100.29
2315	100.33
2314	100.33
2313	100.3
2312	100.27
2311	100.24
2310	100.23
2309	100.23
2308	100.22
2307	100.22
2306	100.22
2305	100.22
2304	100.21
2303	100.2
2302	100.18
2301	100.18
2300	100.18
2299	100.18
2298	100.17
2297	100.16
2296	100.15
2295	100.13
2294	100.12
2293	100.1
2292	100.08
2291	100.07
2290	100.06
2289	100.06
2288	100.04
2287	100.01
2286	100
2285	100.02
2284	100.05
2283	100.09
2282	100.13
2281	100.16
2280	100.18
2279	100.19
2278	100.21
2277	100.22
2276	100.22
2275	100.22
2274	100.23
2273	100.24
2272	100.25
2271	100.25
2270	100.24
2269	100.26
2268	100.28
2267	100.32
2266	100.35
2265	100.35
2264	100.33
2263	100.31
2262	100.3
2261	100.3
2260	100.28
2259	100.26
2258	100.27
2257	100.29
2256	100.33
2255	100.36
2254	100.37
2253	100.37
2252	100.35
2251	100.32
2250	100.31
2249	100.32
2248	100.34
2247	100.36
2246	100.36
2245	100.36
2244	100.34
2243	100.33
2242	100.32
2241	100.32
2240	100.31
2239	100.3
2238	100.3
2237	100.3
2236	100.3
2235	100.31
2234	100.36
2233	100.41
2232	100.43
2231	100.42
2230	100.39
2229	100.36
2228	100.35
2227	100.35
2226	100.35
2225	100.35
2224	100.33
2223	100.31
2222	100.3
2221	100.32
2220	100.33
2219	100.32
2218	100.33
2217	100.34
2216	100.35
2215	100.33
2214	100.28
2213	100.25
2212	100.25
2211	100.26
2210	100.28
2209	100.28
2208	100.28
2207	100.27
2206	100.29
2205	100.31
2204	100.32
2203	100.31
2202	100.3
2201	100.29
2200	100.29
2199	100.28
2198	100.29
2197	100.31
2196	100.33
2195	100.33
2194	100.32
2193	100.3
2192	100.26
2191	100.22
2190	100.2
2189	100.2
2188	100.2
2187	100.2
2186	100.19
2185	100.19
2184	100.19
2183	100.23
2182	100.32
2181	100.41
2180	100.44
2179	100.4
2178	100.34
2177	100.33
2176	100.37
2175	100.43
2174	100.46
2173	100.42
2172	100.31
2171	100.17
2170	100.04
2169	99.92
2168	99.79
2167	99.68
2166	99.64
2165	99.65
2164	99.63
2163	99.58
2162	99.59
2161	99.83
2160	100.32
2159	100.9
2158	101.37
2157	101.57
2156	101.54
2155	101.41
2154	101.29
2153	101.2
2152	101.11
2151	101.04
2150	101.02
2149	101.04
2148	101.06
2147	101.06
2146	101.04
2145	101.01
2144	101.01
2143	101.02
2142	101.04
2141	101.04
2140	101.01
2139	100.96
2138	100.95
2137	100.98
2136	101.03
2135	101.1
2134	101.16
2133	101.2
2132	101.2
2131	101.15
2130	101.1
2129	101.04
2128	100.97
2127	100.91
2126	100.86
2125	100.81
2124	100.75
2123	100.68
2122	100.63
2121	100.6
2120	100.59
2119	100.58
2118	100.56
2117	100.53
2116	100.49
2115	100.45
2114	100.41
2113	100.4
2112	100.39
2111	100.4
2110	100.42
2109	100.45
2108	100.48
2107	100.48
2106	100.47
2105	100.45
2104	100.43
2103	100.41
2102	100.41
2101	100.42
2100	100.42
2099	100.43
2098	100.46
2097	100.52
2096	100.57
2095	100.6
2094	100.61
2093	100.61
2092	100.58
2091	100.53
2090	100.47
2089	100.41
2088	100.37
2087	100.36
2086	100.37
2085	100.37
2084	100.35
2083	100.3
2082	100.25
2081	100.21
2080	100.18
2079	100.14
2078	100.13
2077	100.14
2076	100.16
2075	100.2
2074	100.23
2073	100.25
2072	100.23
2071	100.2
2070	100.19
2069	100.2
2068	100.21
2067	100.22
2066	100.23
2065	100.24
2064	100.25
2063	100.25
2062	100.26
2061	100.28
2060	100.28
2059	100.27
2058	100.23
2057	100.18
2056	100.12
2055	100.03
2054	99.93
2053	99.79
2052	99.64
2051	99.55
2050	99.58
2049	99.71
2048	99.83
2047	99.92
2046	99.97
2045	99.97
2044	99.92
2043	99.84
2042	99.78
2041	99.76
2040	99.74
2039	99.7
2038	99.69
2037	99.73
2036	99.81
2035	99.9
2034	100
2033	100.08
2032	100.12
2031	100.14
2030	100.18
2029	100.25
2028	100.27
2027	100.24
2026	100.2
2025	100.2
2024	100.22
2023	100.23
2022	100.25
2021	100.26
2020	100.24
2019	100.21
2018	100.19
2017	100.19
2016	100.18
2015	100.13
2014	100.08
2013	100.06
2012	100.04
2011	100.03
2010	100.07
2009	100.19
2008	100.36
2007	100.52
2006	100.61
2005	100.62
2004	100.56
2003	100.48
[truncated: 1,603 more rows]
